# Supplementary material
Source: publisher figshare collection journal article supplement (https://tandf.figshare.com/ndownloader/files/27189294)
Supplement: Supplementary file 1 [file 27189294]

## Sheet: Africa
Waseem et al. (2021). Supplementary tables. AJES, 68, https://doi.org/10.1080/08120099.2021.1893221
Table 1. Compiled data sets of stable Isotopes of carbon from African Region
		AFRICA
Age	d13C	Taxa	Area	Data Source
1.46	-3.4	P.recki recki	Kenya	Cerling et al. (1999)
1.8	-11.8	Deinotherium bozasi	Kenya	Cerling et al. (1999)
1.8	-0.7	P. recki shungurensis	Kenya	Cerling et al. (1999)
1.8	-1.5	P.recki atavus	Kenya	Cerling et al. (1999)
1.8	0.2	P.recki ileretensis	Kenya	Cerling et al. (1999)
1.8	-2.8	P.recki ileretensis	Kenya	Cerling et al. (1999)
1.8	0.4	P.recki ileretensis	Kenya	Cerling et al. (1999)
1.9	-12.5	Deinotherium bozasi	Kenya	Cerling et al. (1999)
1.9	0	L. adaurora kararae	Kenya	Cerling et al. (1999)
1.9	0.5	L. adaurora kararae	Kenya	Cerling et al. (1999)
1.9	0.3	L. adaurora kararae	Kenya	Cerling et al. (1999)
1.9	-0.1	P. recki shungurensis	Kenya	Cerling et al. (1999)
1.9	0.1	P. recki shungurensis	Kenya	Cerling et al. (1999)
1.9	0.3	P. recki shungurensis	Kenya	Cerling et al. (1999)
2	-10.6	Deinotherium sp.	Kenya	Plummer et al. (2009)
2	-7.6	Deinotherium sp.	Kenya	Plummer et al. (2009)
2	1.97	Elephantidae indet.	Kenya	Plummer et al. (2009)
2	1.61	Elephantidae indet.	Kenya	Plummer et al. (2009)
2.66	-4.4	L. exoptata	Tanzania	Kingston & Harrison (2007)
2.66	-3.1	L. exoptata	Tanzania	Kingston & Harrison (2007)
2.66	-1.9	L. exoptata	Tanzania	Kingston & Harrison (2007)
2.66	0.2	L. exoptata	Tanzania	Kingston & Harrison (2007)
2.66	-1.2	L. exoptata	Tanzania	Kingston (2011)
2.66	-4.8	L. exoptata	Tanzania	Kingston (2011)
2.66	-1.4	L. exoptata	Tanzania	Kingston (2011)
3.1	-13.1	Deinotherium bozasi	Kenya	Cerling et al. (1999)
3.1	-13.7	Deinotherium bozasi	Kenya	Cerling et al. (1999)
3.1	-3.1	L. exoptata	Kenya	Cerling et al. (1999)
3.1	-1.9	P. recki brumpti	Kenya	Cerling et al. (1999)
3.1	-2	P. recki brumpti	Kenya	Cerling et al. (1999)
3.1	-1.3	P. recki brumpti	Kenya	Cerling et al. (1999)
3.1	0.2	P. recki brumpti	Kenya	Cerling et al. (1999)
3.2	-11.1	Deinotherium bozasi	Kenya	Uno et al. (2011)
3.25	0.1	Loxodonta sp.	Chad	Zazzo et al. (2000)
3.25	0.6	Loxodonta sp.	Chad	Zazzo et al. (2000)
3.25	-0.5	Loxodonta sp.	Chad	Zazzo et al. (2000)
3.25	-1.7	Stegodon kaisensis	Chad	Zazzo et al. (2000)
3.6	-12.3	Deinotherium bozasi	Kenya	Cerling et al. (1999)
3.6	-10.9	Deinotherium bozasi	Kenya	Cerling et al. (1999)
3.65	-12.5	Deinotherium bozasi	Tanzania	Cerling et al. (1999)
3.65	-11.7	Deinotherium bozasi	Tanzania	Cerling et al. (1999)
3.7	-12.3	Deinotherium bozasi	Kenya	Cerling et al. (1999)
3.7	-2.1	L. adaurora adaurora	Kenya	Cerling et al. (1999)
3.7	-2.1	L. adaurora adaurora	Kenya	Cerling et al. (1999)
3.725	-3.6	L. exoptata	Tanzania	Cerling et al. (1999)
3.725	-3.8	L. exoptata	Tanzania	Kingston & Harrison (2007)
3.725	-5.6	L. exoptata	Tanzania	Kingston & Harrison (2007)
3.725	0.9	L. exoptata	Tanzania	Kingston & Harrison (2007)
3.725	-4.4	L. exoptata	Tanzania	Kingston & Harrison (2007)
3.725	-1.2	L. exoptata	Tanzania	Kingston & Harrison (2007)
3.725	-3.4	L. exoptata	Tanzania	Kingston & Harrison (2007)
3.725	-2.6	L. exoptata	Tanzania	Kingston & Harrison (2007)
3.725	-4.7	L. exoptata	Tanzania	Kingston & Harrison (2007)
3.725	-3.5	L. exoptata	Tanzania	Kingston & Harrison (2007)
3.725	-4.7	L. exoptata	Tanzania	Kingston & Harrison (2007)
3.725	-0.5	L. exoptata	Tanzania	Kingston & Harrison (2007)
3.725	-5	L. exoptata	Tanzania	Kingston & Harrison (2007)
3.725	-2	L. exoptata	Tanzania	Kingston & Harrison (2007)
3.725	-1.4	L. exoptata	Tanzania	Kingston (2011)
3.725	-5.9	L. exoptata	Tanzania	Kingston (2011)
3.725	-6.3	L. exoptata	Tanzania	Kingston (2011)
3.725	-3.3	L. exoptata	Tanzania	Kingston (2011)
3.725	-3.8	L. exoptata	Tanzania	Kingston (2011)
3.725	-2.5	L. exoptata	Tanzania	Kingston (2011)
3.725	-4.2	L. exoptata	Tanzania	Kingston (2011)
3.725	-4.3	L. exoptata	Tanzania	Kingston (2011)
3.73	-11.7	Deinotherium bozasi	Tanzania	Kingston (2011)
3.73	-11.5	Deinotherium bozasi	Tanzania	Kingston (2011)
3.9	-13	Deinotherium sp.	Kenya	Schoeninger et al. (2003)
3.9	-14.7	Deinotherium sp.	Kenya	Schoeninger et al. (2003)
4	-2.5	Anancus kenyensis	Tanzania	Kingston & Harrison (2007)
4.1	-0.1	Anancus kenyensis	Kenya	Cerling et al. (1999)
4.1	-12.4	Deinotherium bozasi	Kenya	Cerling et al. (1999)
4.1	-12.6	Deinotherium bozasi	Kenya	Cerling et al. (1999)
4.1	-12.7	Deinotherium bozasi	Kenya	Cerling et al. (1999)
4.1	-1.7	E. ekorensis	Kenya	Cerling et al. (1999)
4.1	-1.5	E. ekorensis	Kenya	Cerling et al. (1999)
4.1	-2.5	E. ekorensis	Kenya	Cerling et al. (1999)
4.1	-2.7	L. adaurora adaurora	Kenya	Cerling et al. (1999)
4.1	-1.1	L. adaurora adaurora	Kenya	Cerling et al. (1999)
4.1	-3	L. adaurora adaurora	Kenya	Cerling et al. (1999)
4.1	-2.5	L. adaurora adaurora	Kenya	Cerling et al. (2015)
4.1	-1.1	L. adaurora adaurora	Kenya	Harris et al. (2003)
4.2	-10.5	Anancus kenyensis	Tanzania	Kingston (2011)
4.2	-1.7	Loxodonta sp.	Tanzania	Kingston (2011)
4.2	-0.9	Anancus kenyensis	Kenya	Uno et al. (2011)
4.2	-0.8	Anancus kenyensis	Kenya	Uno et al. (2011)
4.2	-0.7	Anancus kenyensis	Kenya	Uno et al. (2011)
4.2	-2.2	Anancus kenyensis	Kenya	Uno et al. (2011)
4.2	-0.4	Elephantidae indet	Kenya	Uno et al. (2011)
4.2	-0.2	Elephantidae indet	Kenya	Uno et al. (2011)
4.2	-0.8	Primelephas sp.	Kenya	Uno et al. (2011)
4.2	-0.9	Stegotetrabelodon orbus	Kenya	Uno et al. (2011)
4.2	-1.1	Stegotetrabelodon sp.	Kenya	Uno et al. (2011)
4.22	-12.5	Deinotherium bozasi	Kenya	Uno et al. (2011)
4.22	-12	Deinotherium bozasi	Kenya	Uno et al. (2016)
4.4	-0.07	Anancus cf. kenyensis	Ethiopia	Semaw et al. (2005)
4.4	-1.26	Anancus cf. kenyensis	Ethiopia	Semaw et al. (2005)
4.4	-2.05	Anancus cf. kenyensis	Ethiopia	Semaw et al. (2005)
4.4	-2.11	Anancus cf. kenyensis	Ethiopia	Semaw et al. (2005)
4.4	-1.65	Anancus cf. kenyensis	Ethiopia	Semaw et al. (2005)
4.4	-1.87	Anancus cf. kenyensis	Ethiopia	Semaw et al. (2005)
4.4	-1.8	Anancus cf. kenyensis	Ethiopia	Semaw et al. (2005)
4.4	-1.3	Anancus cf. kenyensis	Ethiopia	Semaw et al. (2005)
4.4	-1.28	Anancus cf. kenyensis	Ethiopia	Semaw et al. (2005)
4.4	-11.9	Deinotherium sp.	Ethiopia	Semaw et al. (2005)
4.5	-2.4	Anancus kenyensis	Chad	Zazzo et al. (2000)
4.5	-2	cf. Loxodonta sp.	Chad	Zazzo et al. (2000)
4.5	-1.6	cf. Loxodonta sp.	Chad	Zazzo et al. (2000)
4.5	0.5	Stegodon kaisensis	Chad	Zazzo et al. (2000)
4.5	-5.6	Stegodon kaisensis	Chad	Zazzo et al. (2000)
4.5	-3.6	stegomorph elephantid	Chad	Zazzo et al. (2000)
4.5	-5.4	stegomorph elephantid	Chad	Zazzo et al. (2000)
4.5	-4.2	stegomorph elephantid	Chad	Zazzo et al. (2000)
5.5	-2.1	Anancus kenyensis	Chad	Zazzo et al. (2000)
5.5	-0.2	Anancus kenyensis	Chad	Zazzo et al. (2000)
5.5	-3.5	Anancus kenyensis	Chad	Zazzo et al. (2000)
5.5	0.8	Stegodon kaisensis	Chad	Zazzo et al. (2000)
5.5	-8	Stegodon kaisensis	Chad	Zazzo et al. (2000)
5.5	-5.4	Stegodon kaisensis	Chad	Zazzo et al. (2000)
6	0.7	Anancus sp.	Ethiopia	Levin et al. (2008)
6	0.9	Anancus sp.	Ethiopia	Levin et al. (2008)
6	0.2	Elephantidae indet	Ethiopia	Levin et al. (2008)
6	-2.6	Elephantidae indet	Ethiopia	Levin et al. (2008)
6.5	-2.1	Elephantidae indet.	Kenya	Uno et al. (2011)
6.5	-1.5	Elephantidae indet.	Kenya	Uno et al. (2011)
6.5	-0.9	Elephantidae indet.	Kenya	Uno et al. (2011)
6.5	-0.3	Elephantidae indet.	Kenya	Uno et al. (2011)
6.5	-0.2	Elephantidae indet.	Kenya	Uno et al. (2011)
6.5	-0.1	Elephantidae indet.	Kenya	Uno et al. (2011)
6.5	-1.6	Primelephas / E. nawatensis	Kenya	Uno et al. (2011)
6.5	-1.4	Stegotetrabelodon or Primelephas	Kenya	Uno et al. (2011)
6.5	0.3	Stegotetrabelodon sp.	Kenya	Uno et al. (2011)
6.54	-11.4	Deinotherium bozasi	Kenya	Uno et al. (2011)
7.4	-5.5	Elephantidae indet.	Kenya	Uno et al. (2011)
7.4	-1.8	Gomphotheriid	Kenya	Uno et al. (2011)
7.4	-2.4	Gomphotheriid	Kenya	Uno et al. (2011)
7.4	-3.9	Gomphotheriid	Kenya	Uno et al. (2011)
7.4	0.7	Gomphotheriid	Kenya	Uno et al. (2011)
7.4	-6.2	Stegotetrabelodon orbus or Primelephas gomphotheroides	Kenya	Uno et al. (2011)
7.4	-1	Stegotetrabelodon sp.	Kenya	Uno et al. (2011)
7.44	-9.7	Deinotherium bozasi	Kenya	Uno et al. (2011)
9.3	-9.5	Deinotherium bozasi	Kenya	Cerling et al. (1999)
9.3	-7.3	Tetralophodon sp.	Kenya	Cerling et al. (1999, 2003)
9.3	-9.1	Gomphotheriid	Kenya	Uno et al. (2011)
9.3	-9	Gomphotheriid	Kenya	Uno et al. (2011)
9.3	-8.6	Gomphotheriid	Kenya	Uno et al. (2011)
9.3	-8.4	Gomphotheriid	Kenya	Uno et al. (2011)
9.3	-7.4	Gomphotheriid	Kenya	Uno et al. (2011)
9.3	-6.9	Gomphotheriid	Kenya	Uno et al. (2011)
9.3	-4.6	Tetralophodon sp.	Kenya	Uno et al. (2011)
9.3	-8.1	Tetralophodon sp.	Kenya	Uno et al. (2011)
9.6	-10.4	Gomphotheriid	Kenya	Uno et al. (2011)
9.6	-6.7	Gomphotheriid	Kenya	Uno et al. (2011)
9.6	-9.8	Deinotherium	Kenya	Uno et al. (2011)
9.6	-9.6	Deinotherium	Kenya	Uno et al. (2011)
9.6	-9.5	Deinotherium	Kenya	Uno et al. (2011)
9.6	-9	Deinotherium	Kenya	Uno et al. (2011)
9.6	-8.9	Deinotherium	Kenya	Uno et al. (2011)
9.9	-7.6	Gomphotheriid	Kenya	Cerling et al. (1999, 2003)
9.9	-8.5	cf. Choerolophodon sp.	Kenya	Uno et al. (2011)
9.9	-7.7	Choerolophodon ngorora	Kenya	Uno et al. (2011)
9.9	-9.6	Choerolophodon ngorora	Kenya	Uno et al. (2011)
9.9	-7	Choerolophodon ngorora	Kenya	Uno et al. (2011)
9.9	-8.4	Choerolophodon sp.	Kenya	Uno et al. (2011)
9.9	-6.9	Tetralophodon sp.	Kenya	Uno et al. (2011)
9.9	-11.7	Deinotherium	Kenya	Uno et al. (2011)
9.9	-11.5	Deinotherium	Kenya	Uno et al. (2011)
9.9	-10.7	Deinotherium	Kenya	Uno et al. (2011)
9.9	-10.1	Deinotherium	Kenya	Uno et al. (2011)
9.9	-10	Deinotherium bozasi	Kenya	Uno et al. (2011)
9.9	-9.5	Deinotherium	Kenya	Uno et al. (2011)
11	-10.5	Gomphotheriid	Kenya	Morgan et al. (1994)
13	-10	Gomphotheriid	Kenya	Cerling et al. (1999)
13	-11.8	Prodeinotherium hobleyi	Kenya	Cerling et al. (1999)
13	-11.8	Prodeinotherium hobleyi	Kenya	Cerling et al. (1999)
14	-10.5	Choerolophodon ngorora	Kenya	Cerling et al. (1999)
14	-12.1	Choerolophodon ngorora	Kenya	Cerling et al. (1999)
14	-10.4	Prodeinotherium hobleyi	Kenya	Cerling et al. (1999)
14.5	-10.4	Afrochoerodon kisumuensis	Kenya	Cerling et al. (1999)
14.5	-11.3	Gomphotheriid	Kenya	Cerling et al. (1999)
14.5	-11.2	Prodeinotherium hobleyi	Kenya	Cerling et al. (1999)
14.5	-11.2	Prodeinotherium hobleyi	Kenya	Cerling et al. (1999)
14.5	-11.1	Prodeinotherium hobleyi	Kenya	Cerling et al. (1999)
15.5	-8.5	Gomphotheriid	Kenya	Morgan et al. (1994)
17	-9	Archaeobelodon aff. filholi	Kenya	Cerling et al. (1999)
17	-10	Choerolophodon sp.	Kenya	Cerling et al. (1999)
17	-10.9	Prodeinotherium hobleyi	Kenya	Cerling et al. (1999)
17	-10.4	Prodeinotherium hobleyi	Kenya	Cerling et al. (1999)
17	-9.7	Prodeinotherium hobleyi	Kenya	Cerling et al. (1999)
2.3	-4.7	Paranthropus	Kenya	Patterson et al. (2019)
2.3	-4.5	Paranthropus	Kenya	Patterson et al. (2019)
2.45	-5.1	Paranthropus	Kenya	Patterson et al. (2019)
2.52	-0.3	Paranthropus	Kenya	Patterson et al. (2019)
3	-6.6	Australopithecus	Ethiopia	Patterson et al. (2019)
3	-10.2	Australopithecus	Ethiopia	Patterson et al. (2019)
3	-7.6	Australopithecus	Ethiopia	Patterson et al. (2019)
3	-8	Australopithecus	Ethiopia	Patterson et al. (2019)
3	-2.9	Australopithecus	Ethiopia	Patterson et al. (2019)
3	-6.4	Australopithecus	Ethiopia	Patterson et al. (2019)
3.2	-10.7	Australopithecus	Ethiopia	Patterson et al. (2019)
3.2	-6.4	Australopithecus	Ethiopia	Patterson et al. (2019)
3.2	-4.3	Australopithecus	Ethiopia	Patterson et al. (2019)
3.23	-4.3	Australopithecus	Ethiopia	Patterson et al. (2019)
3.23	-8.6	Australopithecus	Ethiopia	Patterson et al. (2019)
3.3	-10.6	Australopithecus	Ethiopia	Patterson et al. (2019)
3.3	-4.9	Australopithecus	Ethiopia	Patterson et al. (2019)
3.35	-13	Australopithecus	Ethiopia	Patterson et al. (2019)
3.35	-7.7	Australopithecus	Ethiopia	Patterson et al. (2019)
3.35	-7.2	Australopithecus	Ethiopia	Patterson et al. (2019)
3.4	-6.7	Australopithecus	Ethiopia	Patterson et al. (2019)
3.4	-10	Australopithecus	Ethiopia	Patterson et al. (2019)
3.4	-9.6	Australopithecus	Ethiopia	Patterson et al. (2019)
3.42	-4.3	Australopithecus	Ethiopia	Patterson et al. (2019)
4	-11.3	Australopithecus	Kenya	Patterson et al. (2019)
4	-10.8	Australopithecus	Kenya	Patterson et al. (2019)
4	-11.6	Australopithecus	Kenya	Patterson et al. (2019)
4	-10	Australopithecus	Kenya	Patterson et al. (2019)
4.06	-10.2	Australopithecus	Kenya	Patterson et al. (2019)
4.12	-11.6	Australopithecus	Kenya	Patterson et al. (2019)
4.12	-9.5	Australopithecus	Kenya	Patterson et al. (2019)
4.12	-11.3	Australopithecus	Kenya	Patterson et al. (2019)
4.12	-11	Australopithecus	Kenya	Patterson et al. (2019)
4.12	-10.3	Australopithecus	Kenya	Patterson et al. (2019)
4.12	-12	Australopithecus	Kenya	Patterson et al. (2019)
4.12	-11.3	Australopithecus	Kenya	Patterson et al. (2019)
1.42	-1.3	Paranthropus	Kenya	Patterson et al. (2019)
1.46	-1.7	Paranthropus	Kenya	Patterson et al. (2019)
1.5	-0.8	Paranthropus	Kenya	Patterson et al. (2019)
1.5	0.7	Paranthropus	Kenya	Patterson et al. (2019)
1.5	-0.7	Paranthropus	Tanzania	Patterson et al. (2019)
1.52	-3.3	Paranthropus	Kenya	Patterson et al. (2019)
1.52	-2.2	Paranthropus	Kenya	Patterson et al. (2019)
1.52	-1	Paranthropus	Kenya	Patterson et al. (2019)
1.53	0	Paranthropus	Kenya	Patterson et al. (2019)
1.59	-0.6	Paranthropus	Kenya	Patterson et al. (2019)
1.59	-1.6	Paranthropus	Kenya	Patterson et al. (2019)
1.59	0.4	Paranthropus	Kenya	Patterson et al. (2019)
1.59	-1	Paranthropus	Kenya	Patterson et al. (2019)
1.6	0.9	Paranthropus	Kenya	Patterson et al. (2019)
1.73	-1.1	Paranthropus	Kenya	Patterson et al. (2019)
1.73	-1.2	Paranthropus	Kenya	Patterson et al. (2019)
1.73	-3.4	Paranthropus	Kenya	Patterson et al. (2019)
1.73	-1.9	Paranthropus	Kenya	Patterson et al. (2019)
1.76	-1.3	Paranthropus	Kenya	Patterson et al. (2019)
1.77	-1.9	Paranthropus	Kenya	Patterson et al. (2019)
1.77	-1.8	Paranthropus	Kenya	Patterson et al. (2019)
1.77	-2.1	Paranthropus	Kenya	Patterson et al. (2019)
1.78	-0.1	Paranthropus	Kenya	Patterson et al. (2019)
1.8	-1.2	Paranthropus	Tanzania	Patterson et al. (2019)
1.82	0.2	Paranthropus	Kenya	Patterson et al. (2019)
1.82	-2.3	Paranthropus	Kenya	Patterson et al. (2019)
1.82	-1.2	Paranthropus	Kenya	Patterson et al. (2019)
1.93	-2.3	Paranthropus	Kenya	Patterson et al. (2019)
1.8	-8.3	Homo	Tanzania	Patterson et al. (2019)
1.8	-8.8	Homo	Tanzania	Patterson et al. (2019)
1.8	-5.2	Homo	Tanzania	Patterson et al. (2019)
3.03	-3.7	Kenyanthropus	Kenya	Patterson et al. (2019)
3.03	-3	Kenyanthropus	Kenya	Patterson et al. (2019)
3.2	-8.8	Kenyanthropus	Kenya	Patterson et al. (2019)
3.2	-3.9	Kenyanthropus	Kenya	Patterson et al. (2019)
3.23	-4	Kenyanthropus	Kenya	Patterson et al. (2019)
3.24	-5.6	Kenyanthropus	Kenya	Patterson et al. (2019)
3.24	-11.1	Kenyanthropus	Kenya	Patterson et al. (2019)
3.24	-7.2	Kenyanthropus	Kenya	Patterson et al. (2019)
3.24	-6.6	Kenyanthropus	Kenya	Patterson et al. (2019)
3.24	-6.6	Kenyanthropus	Kenya	Patterson et al. (2019)
3.3	-4.9	Kenyanthropus	Kenya	Patterson et al. (2019)
3.3	-5.9	Kenyanthropus	Kenya	Patterson et al. (2019)
3.3	-8.9	Kenyanthropus	Kenya	Patterson et al. (2019)
3.3	-9.9	Kenyanthropus	Kenya	Patterson et al. (2019)
3.3	-11.1	Kenyanthropus	Kenya	Patterson et al. (2019)
3.37	-5.4	Kenyanthropus	Kenya	Patterson et al. (2019)
3.37	-2.7	Kenyanthropus	Kenya	Patterson et al. (2019)
3.4	-9.2	Kenyanthropus	Kenya	Patterson et al. (2019)
4.4	-10.7	Ardipithecus	Ethiopia	Patterson et al. (2019)
4.4	-10.3	Ardipithecus	Ethiopia	Patterson et al. (2019)
4.4	-11.2	Ardipithecus	Ethiopia	Patterson et al. (2019)
4.4	-8.5	Ardipithecus	Ethiopia	Patterson et al. (2019)
4.4	-10.3	Ardipithecus	Ethiopia	Patterson et al. (2019)
1.46	-5	Homo	Kenya	Patterson et al. (2019)
1.51	-3.5	Homo	Kenya	Patterson et al. (2019)
1.52	-5.4	Homo	Kenya	Patterson et al. (2019)
1.52	-5.1	Homo	Kenya	Patterson et al. (2019)
1.53	-5	Homo	Kenya	Patterson et al. (2019)
1.54	-2.6	Homo	Kenya	Patterson et al. (2019)
1.59	-2.6	Homo	Kenya	Patterson et al. (2019)
1.65	-4.2	Homo	Kenya	Patterson et al. (2019)
1.67	-6.6	Homo	Kenya	Patterson et al. (2019)
1.75	-6.4	Homo	Kenya	Patterson et al. (2019)
1.76	-7.7	Homo	Kenya	Patterson et al. (2019)
1.8	-7.4	Homo	Kenya	Patterson et al. (2019)
1.82	-8.4	Homo	Kenya	Patterson et al. (2019)
1.82	-6.1	Homo	Kenya	Patterson et al. (2019)
1.83	-5.5	Homo	Kenya	Patterson et al. (2019)
1.85	-5.8	Homo	Kenya	Patterson et al. (2019)
1.85	-3.9	Homo	Kenya	Patterson et al. (2019)
1.85	-8.6	Homo	Kenya	Patterson et al. (2019)
1.86	-9.9	Homo	Kenya	Patterson et al. (2019)
1.89	-7.5	Homo	Kenya	Patterson et al. (2019)
1.95	-5.8	Homo	Kenya	Patterson et al. (2019)
1.97	-6.4	Homo	Kenya	Patterson et al. (2019)
1.97	-7.2	Homo	Kenya	Patterson et al. (2019)
9.9	-10.7	Bovidae	East Africa	Uno et al. (2011)
9.9	-10.3	Bovidae	East Africa	Uno et al. (2011)
9.9	-11.2	Bovidae	East Africa	Uno et al. (2011)
9.9	-10.6	Bovidae	East Africa	Uno et al. (2011)
9.9	-11.8	Bovidae	East Africa	Uno et al. (2011)
9.9	-10.5	Bovidae	East Africa	Uno et al. (2011)
9.6	-8.8	Bovidae	East Africa	Uno et al. (2011)
9.6	-4.4	Bovidae	East Africa	Uno et al. (2011)
9.6	-3.7	Bovidae	East Africa	Uno et al. (2011)
9.6	-7.6	Bovidae	East Africa	Uno et al. (2011)
9.6	-7.6	Bovidae	East Africa	Uno et al. (2011)
9.3	-2.1	Bovidae	East Africa	Uno et al. (2011)
7.4	-4.5	Bovidae	East Africa	Uno et al. (2011)
7.4	2.2	Bovidae	East Africa	Uno et al. (2011)
7.4	-4.9	Bovidae	East Africa	Uno et al. (2011)
7.4	-4	Bovidae	East Africa	Uno et al. (2011)
6.5	-9	Bovidae	East Africa	Uno et al. (2011)
6.5	0.2	Bovidae	East Africa	Uno et al. (2011)
6.5	-8.5	Bovidae	East Africa	Uno et al. (2011)
6.5	-7.2	Bovidae	East Africa	Uno et al. (2011)
6.5	-3.3	Bovidae	East Africa	Uno et al. (2011)
4.2	-5.8	Bovidae	East Africa	Uno et al. (2011)
4.2	-3.3	Bovidae	East Africa	Uno et al. (2011)
4.2	-2.8	Bovidae	East Africa	Uno et al. (2011)
4.2	-1.7	Bovidae	East Africa	Uno et al. (2011)
3.2	-6.6	Bovidae	East Africa	Uno et al. (2011)
3.2	-2.1	Bovidae	East Africa	Uno et al. (2011)
9.9	-10.5	Equidae	East Africa	Uno et al. (2011)
9.9	-9.5	Equidae	East Africa	Uno et al. (2011)
9.9	-7.8	Equidae	East Africa	Uno et al. (2011)
9.9	-6.3	Equidae	East Africa	Uno et al. (2011)
9.9	-10.1	Equidae	East Africa	Uno et al. (2011)
9.9	-9.6	Equidae	East Africa	Uno et al. (2011)
9.9	-9.4	Equidae	East Africa	Uno et al. (2011)
9.9	-5.8	Equidae	East Africa	Uno et al. (2011)
9.9	-10.5	Equidae	East Africa	Uno et al. (2011)
9.9	-10.4	Equidae	East Africa	Uno et al. (2011)
9.6	-7.3	Equidae	East Africa	Uno et al. (2011)
9.6	-6.6	Equidae	East Africa	Uno et al. (2011)
9.6	-6.2	Equidae	East Africa	Uno et al. (2011)
9.6	-5.5	Equidae	East Africa	Uno et al. (2011)
9.6	-5.3	Equidae	East Africa	Uno et al. (2011)
9.6	-5.1	Equidae	East Africa	Uno et al. (2011)
9.6	-4.8	Equidae	East Africa	Uno et al. (2011)
9.3	-4.8	Equidae	East Africa	Uno et al. (2011)
9.3	-4.4	Equidae	East Africa	Uno et al. (2011)
9.3	-3.5	Equidae	East Africa	Uno et al. (2011)
9.3	-2.8	Equidae	East Africa	Uno et al. (2011)
9.3	-2.7	Equidae	East Africa	Uno et al. (2011)
9.3	-2.2	Equidae	East Africa	Uno et al. (2011)
9.3	-1.9	Equidae	East Africa	Uno et al. (2011)
7.4	-1.9	Equidae	East Africa	Uno et al. (2011)
7.4	-3.8	Equidae	East Africa	Uno et al. (2011)
7.4	-3	Equidae	East Africa	Uno et al. (2011)
7.4	-0.4	Equidae	East Africa	Uno et al. (2011)
6.5	-0.1	Equidae	East Africa	Uno et al. (2011)
6.5	-0.5	Equidae	East Africa	Uno et al. (2011)
6.5	-0.3	Equidae	East Africa	Uno et al. (2011)
6.5	-0.3	Equidae	East Africa	Uno et al. (2011)
4.2	-0.2	Equidae	East Africa	Uno et al. (2011)
4.2	-1.8	Equidae	East Africa	Uno et al. (2011)
4.2	-1.3	Equidae	East Africa	Uno et al. (2011)
4.2	-1	Equidae	East Africa	Uno et al. (2011)
9.9	-11.5	Giraffidae	East Africa	Uno et al. (2011)
9.9	-9.8	Giraffidae	East Africa	Uno et al. (2011)
9.9	-9.5	Giraffidae	East Africa	Uno et al. (2011)
9.9	-12.3	Giraffidae	East Africa	Uno et al. (2011)
9.9	-11.3	Giraffidae	East Africa	Uno et al. (2011)
9.9	-11	Giraffidae	East Africa	Uno et al. (2011)
9.6	-8.2	Giraffidae	East Africa	Uno et al. (2011)
9.6	-7.5	Giraffidae	East Africa	Uno et al. (2011)
9.6	-6.3	Giraffidae	East Africa	Uno et al. (2011)
9.6	-8.7	Giraffidae	East Africa	Uno et al. (2011)
9.6	-8.4	Giraffidae	East Africa	Uno et al. (2011)
9.6	-7.7	Giraffidae	East Africa	Uno et al. (2011)
9.3	-10.7	Giraffidae	East Africa	Uno et al. (2011)
9.3	-7.6	Giraffidae	East Africa	Uno et al. (2011)
9.3	-7.3	Giraffidae	East Africa	Uno et al. (2011)
7.4	-10.5	Giraffidae	East Africa	Uno et al. (2011)
7.4	-9.1	Giraffidae	East Africa	Uno et al. (2011)
7.4	-11.4	Giraffidae	East Africa	Uno et al. (2011)
7.4	-8.1	Giraffidae	East Africa	Uno et al. (2011)
6.5	-12.2	Giraffidae	East Africa	Uno et al. (2011)
3.2	-9.4	Giraffidae	East Africa	Uno et al. (2011)
9.9	-11.6	Rhinocerotidae	East Africa	Uno et al. (2011)
9.9	-9.2	Rhinocerotidae	East Africa	Uno et al. (2011)
9.9	-8.7	Rhinocerotidae	East Africa	Uno et al. (2011)
9.9	-11.2	Rhinocerotidae	East Africa	Uno et al. (2011)
9.9	-10.3	Rhinocerotidae	East Africa	Uno et al. (2011)
9.6	-9.1	Rhinocerotidae	East Africa	Uno et al. (2011)
9.6	-2.4	Rhinocerotidae	East Africa	Uno et al. (2011)
9.6	-5.7	Rhinocerotidae	East Africa	Uno et al. (2011)
9.6	-3.2	Rhinocerotidae	East Africa	Uno et al. (2011)
7.4	-11	Rhinocerotidae	East Africa	Uno et al. (2011)
7.4	-10.6	Rhinocerotidae	East Africa	Uno et al. (2011)
7.4	-9.7	Rhinocerotidae	East Africa	Uno et al. (2011)
7.4	-9.2	Rhinocerotidae	East Africa	Uno et al. (2011)
6.5	-10.9	Rhinocerotidae	East Africa	Uno et al. (2011)
6.5	-9.8	Rhinocerotidae	East Africa	Uno et al. (2011)
6.5	-9.5	Rhinocerotidae	East Africa	Uno et al. (2011)
6.5	-8	Rhinocerotidae	East Africa	Uno et al. (2011)
6.5	-10.8	Rhinocerotidae	East Africa	Uno et al. (2011)
4.2	-5.5	Rhinocerotidae	East Africa	Uno et al. (2011)
4.2	-2.2	Rhinocerotidae	East Africa	Uno et al. (2011)
4.2	-10.7	Rhinocerotidae	East Africa	Uno et al. (2011)
4.2	-3.6	Rhinocerotidae	East Africa	Uno et al. (2011)
3.2	-0.6	Rhinocerotidae	East Africa	Uno et al. (2011)
3.2	0.5	Rhinocerotidae	East Africa	Uno et al. (2011)
3.2	0.8	Rhinocerotidae	East Africa	Uno et al. (2011)
9.9	-9	Suidae	East Africa	Uno et al. (2011)
9.9	-8.7	Suidae	East Africa	Uno et al. (2011)
9.9	-8.6	Suidae	East Africa	Uno et al. (2011)
9.9	-8.6	Suidae	East Africa	Uno et al. (2011)
9.9	-8.5	Suidae	East Africa	Uno et al. (2011)
9.6	-7.4	Suidae	East Africa	Uno et al. (2011)
9.6	-6.6	Suidae	East Africa	Uno et al. (2011)
9.6	-3.5	Suidae	East Africa	Uno et al. (2011)
9.6	-7	Suidae	East Africa	Uno et al. (2011)
7.4	-8.4	Suidae	East Africa	Uno et al. (2011)
7.4	-8.3	Suidae	East Africa	Uno et al. (2011)
7.4	-8.3	Suidae	East Africa	Uno et al. (2011)
7.4	-7.9	Suidae	East Africa	Uno et al. (2011)
7.4	-9.6	Suidae	East Africa	Uno et al. (2011)
6.5	-3.6	Suidae	East Africa	Uno et al. (2011)
6.5	-2.3	Suidae	East Africa	Uno et al. (2011)
6.5	-9.1	Suidae	East Africa	Uno et al. (2011)
6.5	-0.6	Suidae	East Africa	Uno et al. (2011)
4.2	-5.9	Suidae	East Africa	Uno et al. (2011)
4.2	-2.6	Suidae	East Africa	Uno et al. (2011)
4.2	-2.5	Suidae	East Africa	Uno et al. (2011)
4.2	-4.8	Suidae	East Africa	Uno et al. (2011)
3.2	-2	Suidae	East Africa	Uno et al. (2011)
3.2	-1.8	Suidae	East Africa	Uno et al. (2011)
3.2	-1.2	Suidae	East Africa	Uno et al. (2011)
3.2	-2.9	Suidae	East Africa	Uno et al. (2011)

## Sheet: Europe
Waseem et al. (2021). Supplementary tables. AJES, 68, https://doi.org/10.1080/08120099.2021.1893221
Table 2. Compiled carbon isotope data set from European Region
Europe
Age	d13C	Taxa	Area	Ref.	Sample type
0.8	-10.6153	Elephantidae	Southwestern Europe	Domingo et al. (2013)	Enamel
0.8	-10.8343	Elephantidae	Southwestern Europe	Domingo et al. (2013)	Enamel
0.8	-11.7143	Elephantidae	Southwestern Europe	Domingo et al. (2013)	Enamel
0.8	-9.23467	Equidae	Southwestern Europe	Domingo et al. (2013)	Enamel
0.8	-10.2657	Equidae	Southwestern Europe	Domingo et al. (2013)	Enamel
2.13	-11.31	Bovidae	Southwestern Europe	Domingo et al. (2013)	Enamel
2.13	-9.59	Bovidae	Southwestern Europe	Domingo et al. (2013)	Enamel
2.13	-10.66	Bovidae	Southwestern Europe	Domingo et al. (2013)	Enamel
2.13	-10.7417	Cervidae	Southwestern Europe	Domingo et al. (2013)	Enamel
2.13	-11.61	Cervidae	Southwestern Europe	Domingo et al. (2013)	Enamel
2.13	-10.7417	Cervidae	Southwestern Europe	Domingo et al. (2013)	Enamel
2.6	-10.36	Bovidae	Southwestern Europe	Domingo et al. (2013)	Enamel
2.6	-10.63	Bovidae	Southwestern Europe	Domingo et al. (2013)	Enamel
2.6	-9.84	Bovidae	Southwestern Europe	Domingo et al. (2013)	Enamel
2.6	-9.5	Bovidae	Southwestern Europe	Domingo et al. (2013)	Enamel
2.6	-11.16	Bovidae	Southwestern Europe	Domingo et al. (2013)	Enamel
2.6	-11.55	Bovidae	Southwestern Europe	Domingo et al. (2013)	Enamel
2.6	-10.66	Bovidae	Southwestern Europe	Domingo et al. (2013)	Enamel
2.6	-9.73	Bovidae	Southwestern Europe	Domingo et al. (2013)	Enamel
2.6	-11.11	Cervidae	Southwestern Europe	Domingo et al. (2013)	Enamel
2.6	-8.24	Cervidae	Southwestern Europe	Domingo et al. (2013)	Enamel
2.6	-11.66	Cervidae	Southwestern Europe	Domingo et al. (2013)	Enamel
2.6	-12.161	Cervidae	Southwestern Europe	Domingo et al. (2013)	Enamel
2.6	-10.1297	Cervidae	Southwestern Europe	Domingo et al. (2013)	Enamel
2.6	-10.0467	Cervidae	Southwestern Europe	Domingo et al. (2013)	Enamel
2.6	-12.05	Cervidae	Southwestern Europe	Domingo et al. (2013)	Enamel
2.6	-10.4417	Cervidae	Southwestern Europe	Domingo et al. (2013)	Enamel
2.6	-9.73067	Cervidae	Southwestern Europe	Domingo et al. (2013)	Enamel
3.7	-11.4473	Gomphoteriidae	Southwestern Europe	Domingo et al. (2013)	Enamel
3.7	-11.4753	Gomphoteriidae	Southwestern Europe	Domingo et al. (2013)	Enamel
3.91	-11.56	Bovidae	Southwestern Europe	Domingo et al. (2013)	Enamel
3.91	-10.79	Bovidae	Southwestern Europe	Domingo et al. (2013)	Enamel
3.91	-11.51	Bovidae	Southwestern Europe	Domingo et al. (2013)	Enamel
3.91	-13.02	Bovidae	Southwestern Europe	Domingo et al. (2013)	Enamel
4.19	-10.3	Bovidae	Southwestern Europe	Domingo et al. (2013)	Enamel
4.19	-11.89	Bovidae	Southwestern Europe	Domingo et al. (2013)	Enamel
4.19	-11.82	Bovidae	Southwestern Europe	Domingo et al. (2013)	Enamel
4.19	-11.41	Bovidae	Southwestern Europe	Domingo et al. (2013)	Enamel
4.19	-11.94	Bovidae	Southwestern Europe	Domingo et al. (2013)	Enamel
4.19	-10.99	Bovidae	Southwestern Europe	Domingo et al. (2013)	Enamel
4.19	-12.17	Bovidae	Southwestern Europe	Domingo et al. (2013)	Enamel
5.69	-11.38	Bovidae	Southwestern Europe	Domingo et al. (2013)	Enamel
5.69	-9.21	Bovidae	Southwestern Europe	Domingo et al. (2013)	Enamel
5.69	-9.56	Bovidae	Southwestern Europe	Domingo et al. (2013)	Enamel
5.69	-11.05	Bovidae	Southwestern Europe	Domingo et al. (2013)	Enamel
5.69	-9.74	Bovidae	Southwestern Europe	Domingo et al. (2013)	Enamel
5.69	-9.26	Bovidae	Southwestern Europe	Domingo et al. (2013)	Enamel
5.69	-9.77	Bovidae	Southwestern Europe	Domingo et al. (2013)	Enamel
5.69	-8.76	Bovidae	Southwestern Europe	Domingo et al. (2013)	Enamel
5.69	-8.53	Bovidae	Southwestern Europe	Domingo et al. (2013)	Enamel
5.69	-9.38	Bovidae	Southwestern Europe	Domingo et al. (2013)	Enamel
5.69	-9.13	Bovidae	Southwestern Europe	Domingo et al. (2013)	Enamel
5.69	-12.6207	Cervidae	Southwestern Europe	Domingo et al. (2013)	Enamel
5.69	-11.57	Bovidae	Southwestern Europe	Domingo et al. (2013)	Enamel
5.69	-12.49	Bovidae	Southwestern Europe	Domingo et al. (2013)	Enamel
5.69	-11.47	Bovidae	Southwestern Europe	Domingo et al. (2013)	Enamel
5.69	-11.01	Bovidae	Southwestern Europe	Domingo et al. (2013)	Enamel
5.69	-10.42	Bovidae	Southwestern Europe	Domingo et al. (2013)	Enamel
5.69	-9.19	Bovidae	Southwestern Europe	Domingo et al. (2013)	Enamel
5.69	-10.24	Bovidae	Southwestern Europe	Domingo et al. (2013)	Enamel
5.69	-9.62	Bovidae	Southwestern Europe	Domingo et al. (2013)	Enamel
5.69	-11.43	Bovidae	Southwestern Europe	Domingo et al. (2013)	Enamel
6.08	-11.03	Bovidae	Southwestern Europe	Domingo et al. (2013)	Enamel
6.08	-10.19	Bovidae	Southwestern Europe	Domingo et al. (2013)	Enamel
6.08	-9.98	Bovidae	Southwestern Europe	Domingo et al. (2013)	Enamel
6.08	-9.74	Bovidae	Southwestern Europe	Domingo et al. (2013)	Enamel
6.08	-10.45	Bovidae	Southwestern Europe	Domingo et al. (2013)	Enamel
6.08	-9.74	Bovidae	Southwestern Europe	Domingo et al. (2013)	Enamel
6.08	-9.94	Bovidae	Southwestern Europe	Domingo et al. (2013)	Enamel
6.08	-9.96	Bovidae	Southwestern Europe	Domingo et al. (2013)	Enamel
6.08	-9.35	Bovidae	Southwestern Europe	Domingo et al. (2013)	Enamel
6.08	-10.16	Bovidae	Southwestern Europe	Domingo et al. (2013)	Enamel
6.32	-9.69	Bovidae	Southwestern Europe	Domingo et al. (2013)	Enamel
6.32	-10.26	Bovidae	Southwestern Europe	Domingo et al. (2013)	Enamel
6.32	-11.73	Bovidae	Southwestern Europe	Domingo et al. (2013)	Enamel
6.32	-12	Bovidae	Southwestern Europe	Domingo et al. (2013)	Enamel
6.32	-12.49	Cervidae	Southwestern Europe	Domingo et al. (2013)	Enamel
6.32	-11.4437	Cervidae	Southwestern Europe	Domingo et al. (2013)	Enamel
6.32	-12.2597	Cervidae	Southwestern Europe	Domingo et al. (2013)	Enamel
7.01	-8.69	Bovidae	Southwestern Europe	Domingo et al. (2013)	Enamel
7.01	-10.34	Bovidae	Southwestern Europe	Domingo et al. (2013)	Enamel
7.01	-8.63	Bovidae	Southwestern Europe	Domingo et al. (2013)	Enamel
7.01	-9.9	Bovidae	Southwestern Europe	Domingo et al. (2013)	Enamel
7.01	-8.45	Bovidae	Southwestern Europe	Domingo et al. (2013)	Enamel
7.01	-7.95	Bovidae	Southwestern Europe	Domingo et al. (2013)	Enamel
7.01	-10.54	Bovidae	Southwestern Europe	Domingo et al. (2013)	Enamel
7.01	-9.543	Mammutidae	Southwestern Europe	Domingo et al. (2013)	Enamel
7.01	-9.809	Mammutidae	Southwestern Europe	Domingo et al. (2013)	Enamel
7.01	-10.4263	Gomphoteriidae	Southwestern Europe	Domingo et al. (2013)	Enamel
7.01	-9.80233	Gomphoteriidae	Southwestern Europe	Domingo et al. (2013)	Enamel
7.01	-9.34633	Gomphoteriidae	Southwestern Europe	Domingo et al. (2013)	Enamel
7.01	-9.31033	Gomphoteriidae	Southwestern Europe	Domingo et al. (2013)	Enamel
7.01	-10.569	Suidae	Southwestern Europe	Domingo et al. (2013)	Enamel
7.01	-12.13	Cervidae	Southwestern Europe	Domingo et al. (2013)	Enamel
7.01	-12.2687	Cervidae	Southwestern Europe	Domingo et al. (2013)	Enamel
7.01	-9.23	Bovidae	Southwestern Europe	Domingo et al. (2013)	Enamel
7.01	-11.33	Bovidae	Southwestern Europe	Domingo et al. (2013)	Enamel
7.01	-10.17	Bovidae	Southwestern Europe	Domingo et al. (2013)	Enamel
7.01	-11.91	Bovidae	Southwestern Europe	Domingo et al. (2013)	Enamel
7.83	-9.86	Bovidae	Southwestern Europe	Domingo et al. (2013)	Enamel
7.83	-9.06	Bovidae	Southwestern Europe	Domingo et al. (2013)	Enamel
7.83	-9.32	Bovidae	Southwestern Europe	Domingo et al. (2013)	Enamel
7.83	-9.71	Bovidae	Southwestern Europe	Domingo et al. (2013)	Enamel
7.83	-9.74	Bovidae	Southwestern Europe	Domingo et al. (2013)	Enamel
7.83	-8.72	Bovidae	Southwestern Europe	Domingo et al. (2013)	Enamel
7.83	-9.54	Bovidae	Southwestern Europe	Domingo et al. (2013)	Enamel
7.83	-9.8	Bovidae	Southwestern Europe	Domingo et al. (2013)	Enamel
7.83	-8.93	Bovidae	Southwestern Europe	Domingo et al. (2013)	Enamel
7.83	-10.24	Bovidae	Southwestern Europe	Domingo et al. (2013)	Enamel
7.83	-9.84067	Gomphoteriidae	Southwestern Europe	Domingo et al. (2013)	Enamel
7.83	-9.432	Gomphoteriidae	Southwestern Europe	Domingo et al. (2013)	Enamel
7.83	-10.235	Gomphoteriidae	Southwestern Europe	Domingo et al. (2013)	Enamel
7.83	-10.625	Suidae	Southwestern Europe	Domingo et al. (2013)	Enamel
7.83	-9.34	Giraffidae	Southwestern Europe	Domingo et al. (2013)	Enamel
7.83	-12.588	Giraffidae	Southwestern Europe	Domingo et al. (2013)	Enamel
7.83	-9.876	Giraffidae	Southwestern Europe	Domingo et al. (2013)	Enamel
8.26	-10.229	Gomphoteriidae	Southwestern Europe	Domingo et al. (2013)	Enamel
8.26	-9.68	Gomphoteriidae	Southwestern Europe	Domingo et al. (2013)	Enamel
8.79	-9.87	Bovidae	Southwestern Europe	Domingo et al. (2013)	Enamel
8.79	-8.48	Bovidae	Southwestern Europe	Domingo et al. (2013)	Enamel
8.79	-7.44	Bovidae	Southwestern Europe	Domingo et al. (2013)	Enamel
8.79	-9.71	Bovidae	Southwestern Europe	Domingo et al. (2013)	Enamel
8.79	-8.89	Bovidae	Southwestern Europe	Domingo et al. (2013)	Enamel
8.79	-9.02	Bovidae	Southwestern Europe	Domingo et al. (2013)	Enamel
8.79	-9.3	Bovidae	Southwestern Europe	Domingo et al. (2013)	Enamel
9.55	-10.2933	Gomphoteriidae	Southwestern Europe	Domingo et al. (2013)	Enamel
9.55	-10.2643	Gomphoteriidae	Southwestern Europe	Domingo et al. (2013)	Enamel
9.55	-9.88933	Gomphoteriidae	Southwestern Europe	Domingo et al. (2013)	Enamel
9.55	-10.2683	Gomphoteriidae	Southwestern Europe	Domingo et al. (2013)	Enamel
9.55	-9.53233	Gomphoteriidae	Southwestern Europe	Domingo et al. (2013)	Enamel
9.55	-10.1533	Gomphoteriidae	Southwestern Europe	Domingo et al. (2013)	Enamel
9.55	-10.6367	Gomphoteriidae	Southwestern Europe	Domingo et al. (2013)	Enamel
9.55	-9.69967	Gomphoteriidae	Southwestern Europe	Domingo et al. (2013)	Enamel
9.55	-10.6413	Gomphoteriidae	Southwestern Europe	Domingo et al. (2013)	Enamel
9.55	-9.87033	Gomphoteriidae	Southwestern Europe	Domingo et al. (2013)	Enamel
9.55	-10.4907	Gomphoteriidae	Southwestern Europe	Domingo et al. (2013)	Enamel
9.55	-10.3093	Gomphoteriidae	Southwestern Europe	Domingo et al. (2013)	Enamel
9.55	-10.5227	Gomphoteriidae	Southwestern Europe	Domingo et al. (2013)	Enamel
9.55	-10.3877	Gomphoteriidae	Southwestern Europe	Domingo et al. (2013)	Enamel
10.87	-9.14033	Gomphoteriidae	Southwestern Europe	Domingo et al. (2013)	Enamel
10.87	-10.7663	Gomphoteriidae	Southwestern Europe	Domingo et al. (2013)	Enamel
10.87	-11.0693	Gomphoteriidae	Southwestern Europe	Domingo et al. (2013)	Enamel
10.87	-9.92633	Gomphoteriidae	Southwestern Europe	Domingo et al. (2013)	Enamel
10.87	-9.84633	Gomphoteriidae	Southwestern Europe	Domingo et al. (2013)	Enamel
11.13	-9.94033	Gomphoteriidae	Southwestern Europe	Domingo et al. (2013)	Enamel
11.13	-10.2393	Gomphoteriidae	Southwestern Europe	Domingo et al. (2013)	Enamel
11.13	-10.0773	Gomphoteriidae	Southwestern Europe	Domingo et al. (2013)	Enamel
11.13	-9.52067	Cervidae	Southwestern Europe	Domingo et al. (2013)	Enamel
11.13	-11.0127	Cervidae	Southwestern Europe	Domingo et al. (2013)	Enamel
10	-10.2	Equidae	Western Europe	Cerling et al. (1997)	Enamel
5	-9.8	Equidae	Western Europe	Cerling et al. (1997)	Enamel
12	-12.4	Elephantidae	Western Europe	Cerling et al. (1997)	Enamel
15	-12	Cervidae	Western Europe	Tutken & Vennemann (2009)	Enamel
6	-11.8	Equidae	Western Europe	Rey et al. (2013)	Enamel
6	-11.8	Equidae	Western Europe	Rey et al. (2013)	Enamel
6	-11.4	Equidae	Western Europe	Rey et al. (2013)	Enamel
4	-12.8	Elephantidae	Eastern Europe	Kovacs et al. (2015)	Enamel
4	-13	Elephantidae	Eastern Europe	Kovacs et al. (2015)	Enamel
4.5	-10.2	Elephantidae	Eastern Europe	Kovacs et al. (2015)	Enamel
3	-10.7	Elephantidae	Eastern Europe	Kovacs et al. (2015)	Enamel
4.5	-14	Elephantidae	Eastern Europe	Kovacs et al. (2015)	Enamel
8-11 Ma	-12.9	Equidae	Eastern Europe	Eastham et al. (2016)	Enamel
8-11 Ma	-13	Equidae	Eastern Europe	Eastham et al. (2016)	Enamel
8-11 Ma	-11	Equidae	Eastern Europe	Eastham et al. (2016)	Enamel
8-11 Ma	-13	Equidae	Eastern Europe	Eastham et al. (2016)	Enamel
8-11 Ma	-13	Equidae	Eastern Europe	Eastham et al. (2016)	Enamel

## Sheet: South America
Waseem et al. (2021). Supplementary tables. AJES, 68, https://doi.org/10.1080/08120099.2021.1893221
Table 3. Compiled data sets of carbon and oxygen stable isotopes from South America.
South America
Age	d13C	d18O	Taxon	Sample type	Ref.
Late Pleistocene	-11.4	-1.56077	Equidae	Enamel	Domingo et al. (2012)
Late Pleistocene	-10.4	-1.75478	Equidae	Enamel	Domingo et al. (2012)
Late Pleistocene	-10.5	-0.202735	Equidae	Enamel	Domingo et al. (2012)
Late Pleistocene	-10.9	-1.17276	Equidae	Enamel	Domingo et al. (2012)
Late Pleistocene	-6.78	-1.06	Toxodontidae	Enamel	Domingo et al. (2020)
Late Pleistocene	-5.32	-2.56	Toxodontidae	Enamel	Domingo et al. (2020)
Late Pleistocene	-5.87	-2.86	Toxodontidae	Enamel	Domingo et al. (2020)
Late Pleistocene	-3.42	-3.11	Toxodontidae	Enamel	Domingo et al. (2020)
Late Pleistocene	-6.01	-2.31	Toxodontidae	Enamel	Domingo et al. (2020)
Late Pleistocene	-6.12	-1.31	Mylodontidae	Enamel	Domingo et al. (2020)
Late Pleistocene	-5.27	-1.62	Mylodontidae	Enamel	Domingo et al. (2020)
Late Pleistocene	-2.23	-0.13	Mylodontidae	Enamel	Domingo et al. (2020)
Late Pleistocene	-3.21	-1.21	Mylodontidae	Enamel	Domingo et al. (2020)
Late Pleistocene	-5.67	-1.25	Mylodontidae	Enamel	Domingo et al. (2020)
Late Pleistocene	-6.93	-1.89	Megatheriidae	Enamel	Domingo et al. (2020)
Late Pleistocene	-8.32	-3.13	Megatheriidae	Enamel	Domingo et al. (2020)
Late Pleistocene	-8.65	-2.96	Megatheriidae	Enamel	Domingo et al. (2020)
Late Pleistocene	-7.14	-1.75	Megatheriidae	Enamel	Domingo et al. (2020)
Late Pleistocene	-6.96	-1.41	Megatheriidae	Enamel	Domingo et al. (2020)
Late Pleistocene	-7.65	-1.94	Equidae	Enamel	Domingo et al. (2020)
Late Pleistocene	-8.43	-2.13	Equidae	Enamel	Domingo et al. (2020)
Late Pleistocene	-7.32	-1.04	Equidae	Enamel	Domingo et al. (2020)
Late Pleistocene	-8.32	-1.87	Equidae	Enamel	Domingo et al. (2020)
Late Pleistocene	-7.94	-1.74	Equidae	Enamel	Domingo et al. (2020)
Late Pleistocene	-8.43	-0.98	Camelidae	Enamel	Domingo et al. (2020)
Late Pleistocene	-8.03	-1.21	Camelidae	Enamel	Domingo et al. (2020)
Late Pleistocene	-6.84	-0.94	Camelidae	Enamel	Domingo et al. (2020)
Late Pleistocene	-7.24	-1.23	Camelidae	Enamel	Domingo et al. (2020)
Late Pleistocene	-6.03	-0.85	Camelidae	Enamel	Domingo et al. (2020)
Late Pleistocene	-7.51	-0.96	Camelidae	Enamel	Domingo et al. (2020)
Late Pleistocene	-8.05	-2.24	Felidae	Enamel	Domingo et al. (2020)
Late Pleistocene	-7.94	-2.01	Felidae	Enamel	Domingo et al. (2020)
Late Pleistocene	-8.13	-1.92	Felidae	Enamel	Domingo et al. (2020)
Late Pleistocene	-8.56	-1.83	Felidae	Enamel	Domingo et al. (2020)
Late Pleistocene	-7.99	-2.25	Felidae	Enamel	Domingo et al. (2020)
Late Pleistocene	-7.0395	-1.94025	Toxodontidae	Enamel	Domingo et al. (2020)
Late Pleistocene	-5.5375	-2.39925	Toxodontidae	Enamel	Domingo et al. (2020)
Late Pleistocene	-2.5495	-2.61925	Toxodontidae	Enamel	Domingo et al. (2020)
Late Pleistocene	-4.7945	-2.80425	Toxodontidae	Enamel	Domingo et al. (2020)
Late Pleistocene	-4.78025	-1.603	Toxodontidae	Enamel	Domingo et al. (2020)
Late Pleistocene	-6.89625	-3.107	Toxodontidae	Enamel	Domingo et al. (2020)
Late Pleistocene	-2.35325	-2.835	Toxodontidae	Enamel	Domingo et al. (2020)
Late Pleistocene	-6.4125	-4.33625	Toxodontidae	Enamel	Domingo et al. (2020)
Late Pleistocene	-5.10625	-1.713	Toxodontidae	Enamel	Domingo et al. (2020)
Late Pleistocene	-2.6485	-3.51725		Enamel	Domingo et al. (2020)
Late Pleistocene	-3.9385	-3.97225	Mylodontidae	Enamel	Domingo et al. (2020)
Late Pleistocene	-7.04025	-2.726	Megatheriidae	Enamel	Domingo et al. (2020)
Late Pleistocene	-7.2285	-2.53725	Megatheriidae	Enamel	Domingo et al. (2020)
Late Pleistocene	-2.2825	-2.42725	Mylodontidae	Enamel	Domingo et al. (2020)
Late Pleistocene	-4.7425	-2.61025	Mylodontidae	Enamel	Domingo et al. (2020)
Late Pleistocene	-3.7375	-3.34825	Mylodontidae	Enamel	Domingo et al. (2020)
Late Pleistocene	-6.50625	-3.167	Mylodontidae	Enamel	Domingo et al. (2020)
Late Pleistocene	-3.27525	-3.395	Mylodontidae	Enamel	Domingo et al. (2020)
Late Pleistocene	-2.19825	-2.526	Mylodontidae	Enamel	Domingo et al. (2020)
Late Pleistocene	-7.4365	-0.48925	Gomphoteriidae	Enamel	Domingo et al. (2020)
Late Pleistocene	-8.3845	-1.40625	Gomphoteriidae	Enamel	Domingo et al. (2020)
Late Pleistocene	-6.07625	-2.993	Gomphoteriidae	Enamel	Domingo et al. (2020)
Late Pleistocene	-2.9565	-1.68325	Gomphoteriidae	Enamel	Domingo et al. (2020)
Late Pleistocene	-6.41025	-2.373	Gomphoteriidae	Enamel	Domingo et al. (2020)
Late Pleistocene	-6.7445	-1.76325	Equidae	Enamel	Domingo et al. (2020)
Late Pleistocene	-10.3942	-1.67	Cervidae	Enamel	Domingo et al. (2020)
Late Pleistocene	-10.3582	-1.911	Cervidae	Enamel	Domingo et al. (2020)
Late Pleistocene	-11.4083	-1.425	Cervidae	Enamel	Domingo et al. (2020)
Late Pleistocene	-9.6025	-1.39825	Cervidae	Enamel	Domingo et al. (2020)
Late Pleistocene	-9.00125	-0.895	Cervidae	Enamel	Domingo et al. (2020)
Late Pleistocene	-10.3435	-1.55825	Cervidae	Enamel	Domingo et al. (2020)
Late Pleistocene	-10.4285	-2.18125	Cervidae	Enamel	Domingo et al. (2020)
Late Pleistocene	-7.61425	-1.59	Felidae	Enamel	Domingo et al. (2020)
Late Pleistocene	-7.09325	-1.068	Felidae	Enamel	Domingo et al. (2020)
Late Pleistocene	-8.59225	-2.216	Felidae	Enamel	Domingo et al. (2020)
Late Pleistocene	-8.50125	-2.034	Felidae	Enamel	Domingo et al. (2020)
Late Pleistocene	-7.7415	-1.17625	Felidae	Enamel	Domingo et al. (2020)
Late Pleistocene	-5.72073	-2.63094	Macraucheniidae	Enamel	Domingo et al. (2012)
Late Pleistocene	-9.9	-0.396741	Equidae	Enamel	Domingo et al. (2012)
Late Pleistocene	-10.1	-0.590746	Equidae	Enamel	Domingo et al. (2012)
Late Pleistocene	-8	-1.07576	Equidae	Enamel	Domingo et al. (2012)
Late Pleistocene	-7.8	-0.00873024	Equidae	Enamel	Domingo et al. (2012)
Late Pleistocene	-8.3	0.476283	Equidae	Enamel	Domingo et al. (2012)
Late Pleistocene	-9	-0.590746	Equidae	Enamel	Domingo et al. (2012)
Late Pleistocene	-8.5	-0.202735	Equidae	Enamel	Domingo et al. (2012)
Late Pleistocene	-7.8	-0.00873024	Equidae	Enamel	Domingo et al. (2012)
Late Pleistocene	-8.1	-0.978756	Equidae	Enamel	Domingo et al. (2012)
Late Pleistocene	-8.95605	1.67504	Camelidae	Enamel	Domingo et al. (2012)
Late Pleistocene	-9.53367	-1.76727	Macraucheniidae	Enamel	Domingo et al. (2012)
Late Pleistocene	-11.7246	-2.60969	Dasypodidae	Enamel	Domingo et al. (2012)
Late Pleistocene	-10.7	-1.07576	Equidae	Enamel	Domingo et al. (2012)
Late Pleistocene	-11	-1.07576	Equidae	Enamel	Domingo et al. (2012)
Late Pleistocene	-10.2	0.37928	Equidae	Enamel	Domingo et al. (2012)
Late Pleistocene	-11.2139	2.20963	Camelidae	Enamel	Domingo et al. (2012)
Late Pleistocene	-10.837	1.10419	Camelidae	Enamel	Domingo et al. (2012)
Late Pleistocene	-9.49496	3.60825	Camelidae	Enamel	Domingo et al. (2012)
Late Pleistocene	-8.5	-1.07576	Equidae	Enamel	Domingo et al. (2012)
Late Pleistocene	-7.9	-1.17276	Equidae	Enamel	Domingo et al. (2012)
Late Pleistocene	-9.8	-1.65777	Equidae	Enamel	Domingo et al. (2012)
Late Pleistocene	-9.6	-1.75478	Equidae	Enamel	Domingo et al. (2012)
Late Pleistocene	-9.4	0.573285	Equidae	Enamel	Domingo et al. (2012)
Late Pleistocene	-11.6	-0.105733	Equidae	Enamel	Domingo et al. (2012)
Late Pleistocene	-12	-2.04579	Equidae	Enamel	Domingo et al. (2012)
Late Pleistocene	-10.1	-2.5308	Equidae	Enamel	Domingo et al. (2012)
Late Pleistocene	-8.2	-0.784751	Equidae	Enamel	Domingo et al. (2012)
Late Pleistocene	-11.7	-0.493743	Equidae	Enamel	Domingo et al. (2012)
Late Pleistocene	-11.2	-0.299738	Equidae	Enamel	Domingo et al. (2012)
Late Pleistocene	-10.6	-0.687749	Equidae	Enamel	Domingo et al. (2012)
Late Pleistocene	-12.1	-0.202735	Equidae	Enamel	Domingo et al. (2012)
Late Pleistocene	-11.3	-0.299738	Equidae	Enamel	Domingo et al. (2012)
Late Pleistocene	-11.2	-0.396741	Equidae	Enamel	Domingo et al. (2012)
Late Pleistocene	-8.83161	-3.8665	Macraucheniidae	Enamel	Domingo et al. (2012)
Late Pleistocene	-5.75016	-1.53587	Equidae	Enamel	Domingo et al. (2012)
Late Pleistocene	-4.77985	-2.61562	Equidae	Enamel	Domingo et al. (2012)
Late Pleistocene	-8.8	-3.11281	Glyptodontidae	Enamel	Domingo et al. (2012)
Late Pleistocene	-9.9	-0.396741	Glyptodontidae	Enamel	Domingo et al. (2012)
Late Pleistocene	-5.3	-3.98584	Glyptodontidae	Enamel	Domingo et al. (2012)
Late Pleistocene	-10.5	-0.590746	Glyptodontidae	Enamel	Domingo et al. (2012)
Late Pleistocene	-5.8788	-2.13111	Gomphoteriidae	Enamel	Domingo et al. (2012)
Late Pleistocene	-9.39006	-3.61429	Gomphoteriidae	Enamel	Domingo et al. (2012)
Late Pleistocene	-7.0336	1.11704	Gomphoteriidae	Enamel	Domingo et al. (2012)
Early Pleistocene	-9.42411	-2.02269	Equidae	Enamel	Domingo et al. (2012)
Early Pleistocene	-9.60773	-3.22653	Equidae	Enamel	Domingo et al. (2012)
Early Pleistocene	-10.7683	-1.73602	Equidae	Enamel	Domingo et al. (2012)
Early Pleistocene	-10.2903	-1.51535	Equidae	Enamel	Domingo et al. (2012)
Early Pleistocene	-10.4111	-1.67396	Equidae	Enamel	Domingo et al. (2012)
Early Pleistocene	-11.0478	-2.2148	Equidae	Enamel	Domingo et al. (2012)
Early Pleistocene	-7.3	-2.1	Gomphoteriidae	Enamel	Domingo et al. (2012)
Early Pleistocene	-7.4	-2.2	Gomphoteriidae	Enamel	Domingo et al. (2012)
Early Pleistocene	-9.1	-1.8	Gomphoteriidae	Enamel	Domingo et al. (2012)
Early Pleistocene	-9	-1.9	Gomphoteriidae	Enamel	Domingo et al. (2012)
Early Pleistocene	-9	-0.6	Gomphoteriidae	Enamel	Domingo et al. (2012)
Early Pleistocene	-5.9	-0.3	Gomphoteriidae	Enamel	Domingo et al. (2012)
Early Pleistocene	-10.8661	-2.85316	Camelidae	Enamel	Domingo et al. (2012)
Early Pleistocene	-11.9639	-3.03935	Camelidae	Enamel	Domingo et al. (2012)
Early Pleistocene	-11.3462	-1.7508	Camelidae	Enamel	Domingo et al. (2012)
Early Pleistocene	-7.94814	-1.30552	Camelidae	Enamel	Domingo et al. (2012)
Early Pleistocene	-12.7034	-2.91621	Camelidae	Enamel	Domingo et al. (2012)
Early Pleistocene	-7.22663	0.390883	Camelidae	Enamel	Domingo et al. (2012)
Early Pleistocene	-10.5777	-1.40699	Tayassuidae	Enamel	Domingo et al. (2012)
Early Pleistocene	-9.01694	-2.7113	Toxodontidae	Enamel	Domingo et al. (2012)
Early Pleistocene	-9.02792	0.136718	Toxodontidae	Enamel	Domingo et al. (2012)
Early Pleistocene	-9.34926	-1.59416	Macraucheniidae	Enamel	Domingo et al. (2012)
Early Pleistocene	-12.7662	-1.84044	Macraucheniidae	Enamel	Domingo et al. (2012)
Early Pleistocene	-11.4839	-3.14969	Macraucheniidae	Enamel	Domingo et al. (2012)
Early Pliocene	-8.82077	-6.66879	Caviidae	Enamel	Domingo et al. (2020)
Early Pliocene	-10.7925	-6.29225	Caviidae	Enamel	Domingo et al. (2020)
Early Pliocene	-4.0515	-2.94225	Caviidae	Enamel	Domingo et al. (2020)
Early Pliocene	-3.7785	-1.89325	Caviidae	Enamel	Domingo et al. (2020)
Early Pliocene	-8.49441	-5.80594	Caviidae	Enamel	Domingo et al. (2020)
Early Pliocene	-10.1025	-5.73125	Caviidae	Enamel	Domingo et al. (2020)
Early Pliocene	-4.20319	-1.96071	Caviidae	Enamel	Domingo et al. (2020)
Early Pliocene	-5.67839	-1.53028	Caviidae	Enamel	Domingo et al. (2020)
Early Pliocene	-10.4324	-6.177	Caviidae	Enamel	Domingo et al. (2020)
Early Pliocene	-8.20947	-4.92231	Chinchillidae	Enamel	Domingo et al. (2020)
Early Pliocene	-12.5325	-5.81325	Chinchillidae	Enamel	Domingo et al. (2020)
Early Pliocene	-9.08246	-1.55996	Chinchillidae	Enamel	Domingo et al. (2020)
Early Pliocene	-5.3345	-1.55525	Chinchillidae	Enamel	Domingo et al. (2020)
Early Pliocene	-8.28626	-0.0460162	Mesotheriidae	Enamel	Domingo et al. (2020)
Early Pliocene	-8.16905	0.995935	Mesotheriidae	Enamel	Domingo et al. (2020)
Early Pliocene	-8.4925	-0.99825	Mesotheriidae	Enamel	Domingo et al. (2020)
Early Pliocene	-9.54321	1.18889	Mesotheriidae	Enamel	Domingo et al. (2020)
Early Pliocene	-8.7715	0.41975	Mesotheriidae	Enamel	Domingo et al. (2020)
Early Pliocene	-6.0435	-0.16625	Mesotheriidae	Enamel	Domingo et al. (2020)
Early Pliocene	-6.5715	-0.37725	Mesotheriidae	Enamel	Domingo et al. (2020)
Early Pliocene	-8.9225	1.84575	Mesotheriidae	Enamel	Domingo et al. (2020)
Early Pliocene	-7.31424	-2.41589	Hegetotheriidae	Enamel	Domingo et al. (2020)
Early Pliocene	-9.73923	-3.97931	Hegetotheriidae	Enamel	Domingo et al. (2020)
Early Pliocene	-8.5045	-0.84225	Hegetotheriidae	Enamel	Domingo et al. (2020)
Early Pliocene	-7.5205	-3.65725	Hegetotheriidae	Enamel	Domingo et al. (2020)
Early Pliocene	-8.80965	-2.85127	Hegetotheriidae	Enamel	Domingo et al. (2020)
Early Pliocene	-6.2495	-1.63225	Hegetotheriidae	Enamel	Domingo et al. (2020)
Early Pliocene	-6.5675	-1.02425	Toxodontidae	Enamel	Domingo et al. (2020)
Early Pliocene	-7.7885	0.98475	Toxodontidae	Enamel	Domingo et al. (2020)
Early Pliocene	-3.4515	-0.50025	Toxodontidae	Enamel	Domingo et al. (2020)
Early Pliocene	-11.2791	-3.8665	Proterotheriidae	Enamel	Domingo et al. (2020)
Early Pliocene	-10.0725	-2.28225	Proterotheriidae	Enamel	Domingo et al. (2020)
Early Pliocene	-9.1765	-2.99925	Macraucheniidae	Enamel	Domingo et al. (2020)
Early Pliocene	-10.5115	-0.30125	Macraucheniidae	Enamel	Domingo et al. (2020)
Early Pliocene	-10.5605	-1.44225	Macraucheniidae	Enamel	Domingo et al. (2020)
Early Pliocene	-10.3185	-2.83325	Macraucheniidae	Enamel	Domingo et al. (2020)
Early Pliocene	-9.3175	0.17675	Proterotheriidae	Enamel	Domingo et al. (2020)
Early Pliocene	-9.8855	-1.35925	Proterotheriidae	Enamel	Domingo et al. (2020)
Early Pliocene	-5.0235	-3.78325		Enamel	Domingo et al. (2020)
Early Pliocene	-7.9755	-1.93625	Mylodontidae	Enamel	Domingo et al. (2020)
Early Pliocene	-6.5555	-3.27125	Mylodontidae	Enamel	Domingo et al. (2020)
Late Miocene	-10.23	-6.21	Caviidae	Enamel	Domingo et al. (2020)
Late Miocene	-7.11	-3.16	Caviidae	Enamel	Domingo et al. (2020)
Late Miocene	-8.67	-4.13	Caviidae	Enamel	Domingo et al. (2020)
Late Miocene	-3.98	-1.21	Caviidae	Enamel	Domingo et al. (2020)
Late Miocene	-5.52	-2.04	Caviidae	Enamel	Domingo et al. (2020)
Late Miocene	-8.22	-2.31	Dinomyidae	Enamel	Domingo et al. (2020)
Late Miocene	-9.34	-3.58	Dinomyidae	Enamel	Domingo et al. (2020)
Late Miocene	-6.78	-2.14	Dinomyidae	Enamel	Domingo et al. (2020)
Late Miocene	-6.85	-1.27	Dinomyidae	Enamel	Domingo et al. (2020)
Late Miocene	-7.85	-3.21	Chinchillidae	Enamel	Domingo et al. (2020)
Late Miocene	-9.21	-0.84	Mesotheriidae	Enamel	Domingo et al. (2020)
Late Miocene	-7.12	-1.21	Mesotheriidae	Enamel	Domingo et al. (2020)
Late Miocene	-8.73	-1.43	Mesotheriidae	Enamel	Domingo et al. (2020)
Late Miocene	-9.3	0.21	Mesotheriidae	Enamel	Domingo et al. (2020)
Late Miocene	-6.83	-1.45	Mesotheriidae	Enamel	Domingo et al. (2020)
Late Miocene	-8.21	-0.43	Mesotheriidae	Enamel	Domingo et al. (2020)
Late Miocene	-9.34	-3.73	Hegetotheriidae	Enamel	Domingo et al. (2020)
Late Miocene	-6.85	-1.87	Hegetotheriidae	Enamel	Domingo et al. (2020)
Late Miocene	-7.21	-2.54	Hegetotheriidae	Enamel	Domingo et al. (2020)
Late Miocene	-8.15	-3.14	Hegetotheriidae	Enamel	Domingo et al. (2020)
Late Miocene	-6.52	-1.12	Hegetotheriidae	Enamel	Domingo et al. (2020)
Late Miocene	-7.18	-1.97	Hegetotheriidae	Enamel	Domingo et al. (2020)
Late Miocene	-7.57	-2.45	Mylodontidae	Enamel	Domingo et al. (2020)
Late Miocene	-7.21	-2.23	Mylodontidae	Enamel	Domingo et al. (2020)
Late Miocene	-6.93	-2.75	Mylodontidae	Enamel	Domingo et al. (2020)
Late Miocene	-8.32	-1.24	Dinomyidae	Enamel	Domingo et al. (2020)
Late Miocene	-9.45	-2.84	Caviidae	Enamel	Domingo et al. (2020)
Late Miocene	-9.47	-1.45	Chinchillidae	Enamel	Domingo et al. (2020)
Late Miocene	-9.63	-1.21	Chinchillidae	Enamel	Domingo et al. (2020)
Late Miocene	-9.92	-2.65	Chinchillidae	Enamel	Domingo et al. (2020)
Late Miocene	-11.03	-3.43	Chinchillidae	Enamel	Domingo et al. (2020)
Late Miocene	-10.38	-2.24	Chinchillidae	Enamel	Domingo et al. (2020)
Late Miocene	-10.81	-3.61	Chinchillidae	Enamel	Domingo et al. (2020)
Late Miocene	-9.45	-0.76	Mesotheriidae	Enamel	Domingo et al. (2020)
Late Miocene	-9.31	-1.15	Mesotheriidae	Enamel	Domingo et al. (2020)
Late Miocene	-10.0747	0.396836	Caviidae	Enamel	Domingo et al. (2020)
Late Miocene	-8.56401	1.94382	Caviidae	Enamel	Domingo et al. (2020)
Late Miocene	-10.2169	-5.3189	Caviidae	Enamel	Domingo et al. (2020)
Late Miocene	-9.41236	-1.54134	Chinchillidae	Enamel	Domingo et al. (2020)
Late Miocene	-10.1583	-2.059	Chinchillidae	Enamel	Domingo et al. (2020)
Late Miocene	-10.1612	-0.44778	Chinchillidae	Enamel	Domingo et al. (2020)
Late Miocene	-12.3115	-2.32174	Chinchillidae	Enamel	Domingo et al. (2020)
Late Miocene	-11.7602	-3.878	Chinchillidae	Enamel	Domingo et al. (2020)
Late Miocene	-11.7167	-2.81666	Chinchillidae	Enamel	Domingo et al. (2020)
Late Miocene	-10.7222	-2.58649	Dinomyidae	Enamel	Domingo et al. (2020)
Late Miocene	-7.08413	3.10652	Dinomyidae	Enamel	Domingo et al. (2020)
Late Miocene	-9.59336	-0.199828	Dinomyidae	Enamel	Domingo et al. (2020)
Late Miocene	-10.1334	-0.628558	Dinomyidae	Enamel	Domingo et al. (2020)
Late Miocene	-8.50931	1.14168	Dinomyidae	Enamel	Domingo et al. (2020)
Late Miocene	-10.7789	-0.732282	Mesotheriidae	Enamel	Domingo et al. (2020)
Late Miocene	-9.27511	-0.303553	Mesotheriidae	Enamel	Domingo et al. (2020)
Late Miocene	-10.2199	-1.52652	Mesotheriidae	Enamel	Domingo et al. (2020)
Late Miocene	-9.85095	0.575638	Mesotheriidae	Enamel	Domingo et al. (2020)
Late Miocene	-7.88275	0.732707	Mesotheriidae	Enamel	Domingo et al. (2020)
Late Miocene	-11.0484	-1.18966	Mesotheriidae	Enamel	Domingo et al. (2020)
Late Miocene	-10.8584	-1.95327	Mesotheriidae	Enamel	Domingo et al. (2020)
Late Miocene	-8.01303	-1.86041	Hegetotheriidae	Enamel	Domingo et al. (2020)
Late Miocene	-8.93939	0.581027	Hegetotheriidae	Enamel	Domingo et al. (2020)
Late Miocene	-10.5277	-3.03453	Hegetotheriidae	Enamel	Domingo et al. (2020)
Late Miocene	-10.3721	-2.94607	Hegetotheriidae	Enamel	Domingo et al. (2020)
Late Miocene	-9.78365	-3.57746	Hegetotheriidae	Enamel	Domingo et al. (2020)
Late Miocene	-8.0558	-2.56969	Hegetotheriidae	Enamel	Domingo et al. (2020)
Late Miocene	-9.45711	-2.16467	Hegetotheriidae	Enamel	Domingo et al. (2020)
Late Miocene	-10.6555	-2.09849	Hegetotheriidae	Enamel	Domingo et al. (2020)
Late Miocene	-9.75647	-0.481367	Hegetotheriidae	Enamel	Domingo et al. (2020)
Late Miocene	-9.83869	-1.31872	Hegetotheriidae	Enamel	Domingo et al. (2020)
Late Miocene	-10.4576	0.343492	Toxodontidae	Enamel	Domingo et al. (2020)
Late Miocene	-9.91957	0.728756	Toxodontidae	Enamel	Domingo et al. (2020)
Late Miocene	-10.2043	0.953857	Toxodontidae	Enamel	Domingo et al. (2020)
Late Miocene	-10.2023	-2.27404	Toxodontidae	Enamel	Domingo et al. (2020)
Late Miocene	-10.5372	-0.806372	Toxodontidae	Enamel	Domingo et al. (2020)
Late Miocene	-10.3074	-2.28815	Toxodontidae	Enamel	Domingo et al. (2020)
Late Miocene	-10.1543	0.672448	Proterotheriidae	Enamel	Domingo et al. (2020)
Late Miocene	-11.3759	-0.0350816	Proterotheriidae	Enamel	Domingo et al. (2020)
Late Miocene	-9.73956	-0.769821	Proterotheriidae	Enamel	Domingo et al. (2020)
Late Miocene	-10.2826	-0.722404	Macraucheniidae	Enamel	Domingo et al. (2020)
Late Miocene	-8.99166	0.0876376	Macraucheniidae	Enamel	Domingo et al. (2020)
Late Miocene	-13.3607	-2.66749	Macraucheniidae	Enamel	Domingo et al. (2020)
Late Miocene	-11.1071	-2.63094	Macraucheniidae	Enamel	Domingo et al. (2020)
Late Miocene	-11.7674	-2.1459	Macraucheniidae	Enamel	Domingo et al. (2020)
Late Miocene	-9.03542	-2.74948	Glyptodontidae	Enamel	Domingo et al. (2020)
Late Miocene	-9.46025	-2.863	Glyptodontidae	Enamel	Domingo et al. (2020)
Late Miocene	-10.381	-2.86803	Dasypodidae	Enamel	Domingo et al. (2020)
Late Miocene	-8.6475	-2.45825	Dasypodidae	Enamel	Domingo et al. (2020)
Late Miocene	-10.4058	-1.90319	Mylodontidae	Enamel	Domingo et al. (2020)
Late Miocene	-11.1321	-3.06519	Mylodontidae	Enamel	Domingo et al. (2020)
Late Miocene	-10.7724	-3.68031	Mylodontidae	Enamel	Domingo et al. (2020)
Late Miocene	-10.7282	-2.648	Mylodontidae	Enamel	Domingo et al. (2020)
Late Miocene	-10.7799	-2.65169	Thylacosmilidae	Enamel	Domingo et al. (2020)
Late Miocene	-10.8735	-2.14725	Thylacosmilidae	Enamel	Domingo et al. (2020)
Late Miocene	-10.93	-2.05863	Thylacosmilidae	Enamel	Domingo et al. (2020)
Late Miocene	-9.98173	0.74361	Caviidae	Enamel	Domingo et al. (2020)
Late Miocene	-10.8305	-2.40995	Caviidae	Enamel	Domingo et al. (2020)
Late Miocene	-9.83926	-1.35315	Caviidae	Enamel	Domingo et al. (2020)
Late Miocene	-9.66244	-1.99238	Chinchillidae	Enamel	Domingo et al. (2020)
Late Miocene	-9.72408	0.562531	Chinchillidae	Enamel	Domingo et al. (2020)
Late Miocene	-10.2727	-1.59558	Chinchillidae	Enamel	Domingo et al. (2020)
Late Miocene	-10.2584	-3.11415	Chinchillidae	Enamel	Domingo et al. (2020)
Late Miocene	-7.68709	0.350776	Chinchillidae	Enamel	Domingo et al. (2020)
Late Miocene	-10.3768	-4.32365	Chinchillidae	Enamel	Domingo et al. (2020)
Late Miocene	-9.36336	-1.37097	Mesotheriidae	Enamel	Domingo et al. (2020)
Late Miocene	-8.84062	-0.804429	Mesotheriidae	Enamel	Domingo et al. (2020)
Late Miocene	-9.05738	-0.751196	Mesotheriidae	Enamel	Domingo et al. (2020)
Late Miocene	-9.13817	-0.984829	Mesotheriidae	Enamel	Domingo et al. (2020)
Late Miocene	-10.2798	-5.97217	Mesotheriidae	Enamel	Domingo et al. (2020)
Late Miocene	-10.5031	-2.78893	Hegetotheriidae	Enamel	Domingo et al. (2020)
Late Miocene	-9.59373	-1.33831	Hegetotheriidae	Enamel	Domingo et al. (2020)
Late Miocene	-10.7436	-1.79645	Hegetotheriidae	Enamel	Domingo et al. (2020)
Late Miocene	-8.39726	-3.91659	Glyptodontidae	Enamel	Domingo et al. (2020)
Late Miocene	-8.37417	-3.48356	Glyptodontidae	Enamel	Domingo et al. (2020)
Late Miocene	-10.9117	-4.12674	Thylacosmilidae	Enamel	Domingo et al. (2020)
Late Miocene	-11.1791	-2.9334	Thylacosmilidae	Enamel	Domingo et al. (2020)
Late Miocene	-11.5469	-2.27538	Thylacosmilidae	Enamel	Domingo et al. (2020)
Late Miocene	-11.4246	-3.39451	Thylacosmilidae	Enamel	Domingo et al. (2020)
Late Miocene	-9.43	-1.45	Caviidae	Enamel	Domingo et al. (2020)
Late Miocene	-8.93	-1.03	Caviidae	Enamel	Domingo et al. (2020)
Late Miocene	-10.21	-3.55	Chinchillidae	Enamel	Domingo et al. (2020)
Late Miocene	-9.98	-1.93	Chinchillidae	Enamel	Domingo et al. (2020)
Late Miocene	-7.43	-0.56	Chinchillidae	Enamel	Domingo et al. (2020)
Late Miocene	-8.21	-2.34	Chinchillidae	Enamel	Domingo et al. (2020)
Late Miocene	-10.04	-2.16	Chinchillidae	Enamel	Domingo et al. (2020)
Late Miocene	-9.43	-0.87	Dinomyidae	Enamel	Domingo et al. (2020)
Late Miocene	-9.34	-2.66	Mesotheriidae	Enamel	Domingo et al. (2020)
Late Miocene	-8.93	-0.95	Mesotheriidae	Enamel	Domingo et al. (2020)
Late Miocene	-8.56	-1.32	Mesotheriidae	Enamel	Domingo et al. (2020)
Late Miocene	-9.56	-2.23	Mesotheriidae	Enamel	Domingo et al. (2020)
Late Miocene	-9.83	-3.52	Mesotheriidae	Enamel	Domingo et al. (2020)
Late Miocene	-9.25	-2.12	Mesotheriidae	Enamel	Domingo et al. (2020)
Late Miocene	-8.78	-0.99	Mesotheriidae	Enamel	Domingo et al. (2020)
Late Miocene	-8.56	-1.34	Mesotheriidae	Enamel	Domingo et al. (2020)
Late Miocene	-9.32	-2.16	Hegetotheriidae	Enamel	Domingo et al. (2020)
Late Miocene	-10.05	-1.78	Litopterna	Enamel	Domingo et al. (2020)
Late Miocene	-9.98	-1.42	Litopterna	Enamel	Domingo et al. (2020)
Late Miocene	-9.37	-3.45	Glyptodontidae	Enamel	Domingo et al. (2020)
Late Miocene	-9.14	-2.94	Glyptodontidae	Enamel	Domingo et al. (2020)
Late Miocene	-8.93	-2.53	Glyptodontidae	Enamel	Domingo et al. (2020)
Late Miocene	-8.56	-2.72	Glyptodontidae	Enamel	Domingo et al. (2020)
Late Miocene	-8.65	-0.97	Caviidae	Enamel	Domingo et al. (2020)
Late Miocene	-10.15	-2.28	Chinchillidae	Enamel	Domingo et al. (2020)
Late Miocene	-9.76	-2.14	Chinchillidae	Enamel	Domingo et al. (2020)
Late Miocene	-10.21	-4.12	Dinomyidae	Enamel	Domingo et al. (2020)
Late Miocene	-7.37	-3.97	Dinomyidae	Enamel	Domingo et al. (2020)
Late Miocene	-8.74	-2.23	Dinomyidae	Enamel	Domingo et al. (2020)
Late Miocene	-10.03	-2.8263	Dinomyidae	Enamel	Domingo et al. (2020)
Late Miocene	-7.04	-0.06	Mesotheriidae	Enamel	Domingo et al. (2020)
Late Miocene	-9.13	-2.34	Mesotheriidae	Enamel	Domingo et al. (2020)
Late Miocene	-9.75	-2.94	Mesotheriidae	Enamel	Domingo et al. (2020)
Late Miocene	-8.43	-2.07	Mesotheriidae	Enamel	Domingo et al. (2020)
Late Miocene	-8.21	-2.05	Mesotheriidae	Enamel	Domingo et al. (2020)
Late Miocene	-8.96	-1.48	Hegetotheriidae	Enamel	Domingo et al. (2020)
Late Miocene	-10.32	-2.09	Hegetotheriidae	Enamel	Domingo et al. (2020)
Late Miocene	-8.77	-1.36	Hegetotheriidae	Enamel	Domingo et al. (2020)
Late Miocene	-8.04	-2.61621	Hegetotheriidae	Enamel	Domingo et al. (2020)
Late Miocene	-9.06	-2.34	Hegetotheriidae	Enamel	Domingo et al. (2020)
Late Miocene	-9.76	-3.15	Hegetotheriidae	Enamel	Domingo et al. (2020)
Late Miocene	-8.87	-1.94	Hegetotheriidae	Enamel	Domingo et al. (2020)
Late Miocene	-7.26	1.84	Hegetotheriidae	Enamel	Domingo et al. (2020)
Late Miocene	-10.73	-2.31	Toxodontidae	Enamel	Domingo et al. (2020)
Late Miocene	-9.24	-3.92	Toxodontidae	Enamel	Domingo et al. (2020)
Late Miocene	-8.36	-1.87	Toxodontidae	Enamel	Domingo et al. (2020)
Late Miocene	-6.77	-2.12	Toxodontidae	Enamel	Domingo et al. (2020)
Late Miocene	-9.45	-3.56	Toxodontidae	Enamel	Domingo et al. (2020)
Late Miocene	-8.19	-1.67	Toxodontidae	Enamel	Domingo et al. (2020)
Late Miocene	-7.95	-0.74	Toxodontidae	Enamel	Domingo et al. (2020)
Late Miocene	-12.9913	-6.67692	Caviidae	Enamel	Domingo et al. (2020)
Late Miocene	-13.4588	-7.09034	Caviidae	Enamel	Domingo et al. (2020)
Late Miocene	-12.0374	-6.79433	Caviidae	Enamel	Domingo et al. (2020)
Late Miocene	-12.8601	-4.51115	Caviidae	Enamel	Domingo et al. (2020)
Late Miocene	-12.0236	-5.15249	Caviidae	Enamel	Domingo et al. (2020)
Late Miocene	-8.03966	1.13071	Caviidae	Enamel	Domingo et al. (2020)
Late Miocene	-9.96281	-1.26972	Caviidae	Enamel	Domingo et al. (2020)
Late Miocene	-11.5362	-5.2415	Chinchillidae	Enamel	Domingo et al. (2020)
Late Miocene	-10.6633	-2.84207	Chinchillidae	Enamel	Domingo et al. (2020)
Late Miocene	-10.7364	-4.68974	Dinomyidae	Enamel	Domingo et al. (2020)
Late Miocene	-10.1959	-4.65323	Dinomyidae	Enamel	Domingo et al. (2020)
Late Miocene	-12.2377	-6.86314	Dinomyidae	Enamel	Domingo et al. (2020)
Late Miocene	-10.0909	-2.8263	Dinomyidae	Enamel	Domingo et al. (2020)
Late Miocene	-7.04058	-2.14511	Dinomyidae	Enamel	Domingo et al. (2020)
Late Miocene	-8.54469	-1.50472	Mesotheriidae	Enamel	Domingo et al. (2020)
Late Miocene	-8.70349	-2.67493	Mesotheriidae	Enamel	Domingo et al. (2020)
Late Miocene	-9.35253	4.37	Mesotheriidae	Enamel	Domingo et al. (2020)
Late Miocene	-7.45178	-0.0641601	Mesotheriidae	Enamel	Domingo et al. (2020)
Late Miocene	-8.54863	-1.95958	Mesotheriidae	Enamel	Domingo et al. (2020)
Late Miocene	-9.81404	0.608219	Mesotheriidae	Enamel	Domingo et al. (2020)
Late Miocene	-8.24779	-1.21661	Hegetotheriidae	Enamel	Domingo et al. (2020)
Late Miocene	-9.01124	-2.05134	Hegetotheriidae	Enamel	Domingo et al. (2020)
Late Miocene	-8.88104	-1.05479	Hegetotheriidae	Enamel	Domingo et al. (2020)
Late Miocene	-7.92228	-1.61621	Hegetotheriidae	Enamel	Domingo et al. (2020)
Late Miocene	-9.10762	-2.89826	Hegetotheriidae	Enamel	Domingo et al. (2020)
Late Miocene	-9.66916	-0.414433	Hegetotheriidae	Enamel	Domingo et al. (2020)
Late Miocene	-8.17183	4.15392	Hegetotheriidae	Enamel	Domingo et al. (2020)
Late Miocene	-9.95296	-1.65024	Hegetotheriidae	Enamel	Domingo et al. (2020)
Late Miocene	-7.04342	-1.54123	Hegetotheriidae	Enamel	Domingo et al. (2020)
Late Miocene	-7.92919	0.913644	Hegetotheriidae	Enamel	Domingo et al. (2020)
Late Miocene	-9.76774	-2.3748	Hegetotheriidae	Enamel	Domingo et al. (2020)
Late Miocene	-7.98048	-0.217096	Hegetotheriidae	Enamel	Domingo et al. (2020)
Late Miocene	-8.85934	-1.54575	Hegetotheriidae	Enamel	Domingo et al. (2020)
Late Miocene	-6.74994	-1.73699	Toxodontidae	Enamel	Domingo et al. (2020)
Late Miocene	-8.05046	-1.29437	Toxodontidae	Enamel	Domingo et al. (2020)
Late Miocene	-7.00889	-0.212163	Toxodontidae	Enamel	Domingo et al. (2020)
Late Miocene	-6.57982	0.908711	Toxodontidae	Enamel	Domingo et al. (2020)
Late Miocene	-10.3342	-1.96077	Toxodontidae	Enamel	Domingo et al. (2020)
Late Miocene	-9.34408	-2.95248	Toxodontidae	Enamel	Domingo et al. (2020)
Late Miocene	-8.52436	-3.05106	Toxodontidae	Enamel	Domingo et al. (2020)
Late Miocene	-9.96774	-0.209993	Toxodontidae	Enamel	Domingo et al. (2020)
Late Miocene	-10.4523	-3.84612	Toxodontidae	Enamel	Domingo et al. (2020)
Late Miocene	-10.0288	-4.4016	Toxodontidae	Enamel	Domingo et al. (2020)
Late Miocene	-10.3037	-4.14431	Toxodontidae	Enamel	Domingo et al. (2020)
Late Miocene	-9.84572	-2.15988	Toxodontidae	Enamel	Domingo et al. (2020)
Late Miocene	-12.6141	1.63443	Homalodotheriidae	Enamel	Domingo et al. (2020)
Late Miocene	-8.13913	2.32745	Homalodotheriidae	Enamel	Domingo et al. (2020)
Late Miocene	-10.7897	-1.23239	Homalodotheriidae	Enamel	Domingo et al. (2020)
Late Miocene	-9.75398	-0.440087	Homalodotheriidae	Enamel	Domingo et al. (2020)
Late Miocene	-10.1007	0.312479	Macraucheniidae	Enamel	Domingo et al. (2020)
Late Miocene	-8.42682	1.53092	Macraucheniidae	Enamel	Domingo et al. (2020)
Late Miocene	-14.1511	-1.28845	Macraucheniidae	Enamel	Domingo et al. (2020)
Late Miocene	-12.6535	1.63443	Macraucheniidae	Enamel	Domingo et al. (2020)
Late Miocene	-10.2653	-1.79417	Macraucheniidae	Enamel	Domingo et al. (2020)
Late Miocene	-9.25541	-1.58222	Macraucheniidae	Enamel	Domingo et al. (2020)
Late Miocene	-8.73012	-1.30936	Litopterna	Enamel	Domingo et al. (2020)
Late Miocene	-9.11383	-1.59155	Litopterna	Enamel	Domingo et al. (2020)
Late Miocene	-10.3823	-0.979438	Litopterna	Enamel	Domingo et al. (2020)
Late Miocene	-11.1191	1.58163	Litopterna	Enamel	Domingo et al. (2020)
Late Miocene	-9.46202	1.80758	Litopterna	Enamel	Domingo et al. (2020)
Late Miocene	-10.332	-3.19688	Pampatheriidae	Enamel	Domingo et al. (2020)
Late Miocene	-8.56145	-2.82096	Nothrotheriidae	Enamel	Domingo et al. (2020)
Late Miocene	-10.7621	-3.63596		Enamel	Domingo et al. (2020)
Late Miocene	-11.1234	-4.23204	Borhyaenoidea	Enamel	Domingo et al. (2020)
Late Miocene	-11.4279	-4.95858	Borhyaenoidea	Enamel	Domingo et al. (2020)
7.05	-10.9	-11.6		Carbonate	Mulch et al. (2010)
7.07	-11	-12.2		Carbonate	Mulch et al. (2010)
7.16	-10.1	-12.2		Carbonate	Mulch et al. (2010)
7.27	-8.9	-11.9		Carbonate	Mulch et al. (2010)
7.32	-10.5	-13.4		Carbonate	Mulch et al. (2010)
7.34	-10.5	-11.9		Carbonate	Mulch et al. (2010)
7.35	-10.4	-13.8		Carbonate	Mulch et al. (2010)
7.36	-9.6	-11		Carbonate	Mulch et al. (2010)
7.36	-10.5	-13.7		Carbonate	Mulch et al. (2010)
7.36	-9.5	-9.8		Carbonate	Mulch et al. (2010)
7.37	-9.9	-12.6		Carbonate	Mulch et al. (2010)
7.39	-9.1	-12.9		Carbonate	Mulch et al. (2010)
7.43	-9.6	-13		Carbonate	Mulch et al. (2010)
7.45	-10.4	-12.3		Carbonate	Mulch et al. (2010)
7.45	-10.9	-11.7		Carbonate	Mulch et al. (2010)
7.48	-10.2	-11.7		Carbonate	Mulch et al. (2010)
7.5	-9.1	-10.9		Carbonate	Mulch et al. (2010)
7.5	-10.9	-11.9		Carbonate	Mulch et al. (2010)
8.2	-8.5	-12		Carbonate	Mulch et al. (2010)
8.6	-10.8	-11.2		Carbonate	Mulch et al. (2010)
8.7	-9.7	-10.2		Carbonate	Mulch et al. (2010)
8.8	-11.4	-11.8		Carbonate	Mulch et al. (2010)
9	-12.3	-10.9		Carbonate	Mulch et al. (2010)
9	-9.5	-11		Carbonate	Mulch et al. (2010)
9.3	-11.6	-9.7		Carbonate	Mulch et al. (2010)
9.6	-12.1	-10.2		Carbonate	Mulch et al. (2010)
9.9	-11	-10		Carbonate	Mulch et al. (2010)
10.3	-10.4	-13		Carbonate	Mulch et al. (2010)
10.3	-10.2	-13.2		Carbonate	Mulch et al. (2010)
12.5	-7.8	-9		Carbonate	Mulch et al. (2010)
12.5	-8.2	-11.8		Carbonate	Mulch et al. (2010)
12.5	-8.1	-10.9		Carbonate	Mulch et al. (2010)
12.6	-9.3	-9.2		Carbonate	Mulch et al. (2010)
6.03	-10.5	-10.8		Carbonate	Mulch et al. (2010)
6.26	-9.7	-12.5		Carbonate	Mulch et al. (2010)
6.3	-9.4	-13		Carbonate	Mulch et al. (2010)
6.32	-9.7	-12.1		Carbonate	Mulch et al. (2010)
6.38	-9.7	-12.1		Carbonate	Mulch et al. (2010)
6.43	-9.9	-13		Carbonate	Mulch et al. (2010)
6.51	-9.9	-10.5		Carbonate	Mulch et al. (2010)
6.55	-10	-11.5		Carbonate	Mulch et al. (2010)
6.61	-10.5	-11.5		Carbonate	Mulch et al. (2010)
6.74	-10.3	-13.5		Carbonate	Mulch et al. (2010)
6.82	-10.6	-11.5		Carbonate	Mulch et al. (2010)
6.83	-11.6	-13		Carbonate	Mulch et al. (2010)
6.85	-10.7	-11.6		Carbonate	Mulch et al. (2010)
6.88	-11.2	-14.6		Carbonate	Mulch et al. (2010)
6	-11.3	-12.1		Enamel	Cerling et al. (1997)
6.8	-14.4	-5.9		Carbonate	Lattore et al. (1997)

## Sheet: North America
Waseem et al. (2021). Supplementary tables. AJES, 68, https://doi.org/10.1080/08120099.2021.1893221
Table 4. Compiled data sets of carbon and oxygen isotopes from North American Region
North America
Age	d13C	d18O	Taxon	Sample type	Ref.
2.7	0.2	-5.7	Equidae	Enamel	Lattore et al. (1997)
2.7	-0.8	-4.7	Equidae	Enamel	Lattore et al. (1997)
2.8	-1	-3.7	Equidae	Enamel	Lattore et al. (1997)
2.8	-0.5	-4.3	Equidae	Enamel	Lattore et al. (1997)
2.9	-8.2	-7.5	Equidae	Enamel	Lattore et al. (1997)
5.9	-8.1	-6.4	Equidae	Enamel	Lattore et al. (1997)
6.3	-3.1	-1.4	Equidae	Enamel	Lattore et al. (1997)
6.3	-3.1	-1.7	Equidae	Enamel	Lattore et al. (1997)
6.3	-2.3	-0.7	Equidae	Enamel	Lattore et al. (1997)
6.93	-7.2	-4.8	Equidae	Enamel	Lattore et al. (1997)
6.93	-9.5	2	Equidae	Enamel	Lattore et al. (1997)
6.93	-8.1	-1.7	Equidae	Enamel	Lattore et al. (1997)
6.93	-7.8	-2.9	Equidae	Enamel	Lattore et al. (1997)
9.2	-8.9	-5.6	Equidae	Enamel	Lattore et al. (1997)
9.2	-8.7	-4	Equidae	Enamel	Lattore et al. (1997)
9.2	-8.6	-2.2	Equidae	Enamel	Lattore et al. (1997)
9.2	-9	-3.9	Equidae	Enamel	Lattore et al. (1997)
10.7	-8.7	-6.5	Equidae	Enamel	Lattore et al. (1997)
10.7	-9.5	-3.8	Equidae	Enamel	Lattore et al. (1997)
10.7	-9.3	-5	Equidae	Enamel	Lattore et al. (1997)
10.7	-9.5	-6.2	Equidae	Enamel	Lattore et al. (1997)
10.7	-8	-2.6	Equidae	Enamel	Lattore et al. (1997)
15.6	-7.7	-4.3	Equidae	Enamel	Lattore et al. (1997)
15.6	-8.1	-6.7	Equidae	Enamel	Lattore et al. (1997)
6.93	-7.1	-5.3	Gomphotheriidae	Enamel	Lattore et al. (1997)
6.93	-9.6	-9.7	Gomphotheriidae	Enamel	Lattore et al. (1997)
9.2	-8.6	-9	Gomphotheriidae	Enamel	Lattore et al. (1997)
9.2	-8.7	-8.8	Gomphotheriidae	Enamel	Lattore et al. (1997)
9.2	-7.4	-8.3	Gomphotheriidae	Enamel	Lattore et al. (1997)
9.2	-6.9	-8	Gomphotheriidae	Enamel	Lattore et al. (1997)
10.7	-10.8	-7.4	Gomphotheriidae	Enamel	Lattore et al. (1997)
2.7	-6.1	-0.2	Camelidae	Enamel	Lattore et al. (1997)
6.93	-8.4	-7.7	Camelidae	Enamel	Lattore et al. (1997)
6.93	-9	-6.2	Camelidae	Enamel	Lattore et al. (1997)
6.93	-9.1	-0.3	Camelidae	Enamel	Lattore et al. (1997)
10.7	-7.3	-1.8	Camelidae	Enamel	Lattore et al. (1997)
10.7	-7.1	-5	Camelidae	Enamel	Lattore et al. (1997)
10.7	-8.2	-1.6	Camelidae	Enamel	Lattore et al. (1997)
15.5	-7.4	-0.9	Camelidae	Enamel	Lattore et al. (1997)
15.6	-7.5	2.1	Camelidae	Enamel	Lattore et al. (1997)
5.2	-6.8	-9.4	?	Enamel	Lattore et al. (1997)
5.2	-10	-7.9	?	Enamel	Lattore et al. (1997)
5.2	-7.5	0.4	?	Enamel	Lattore et al. (1997)
9.2	-8.7	-4.6	?	Enamel	Lattore et al. (1997)
9.2	-8.6	-5.4	?	Enamel	Lattore et al. (1997)
9.2	-8.9	-6.3	Rhinocerotidae	Enamel	Lattore et al. (1997)
3.29	-4.1	-6.2		Paleosol carbonate	Wang et al. (1994)
2.81	-3.7	-7.8		Paleosol carbonate	Wang et al. (1994)
2.8	-3.8	-6.9		Paleosol carbonate	Wang et al. (1994)
2.7	-5	-7.3		Paleosol carbonate	Wang et al. (1994)
2.7	-2.3	-7.6		Paleosol carbonate	Wang et al. (1994)
2.64	-3.8	-8.2		Paleosol carbonate	Wang et al. (1994)
2.6	-3.8	-8.2		Paleosol carbonate	Wang et al. (1994)
2.59	-4.1	-8.7		Paleosol carbonate	Wang et al. (1994)
2.56	-3.4	-7.1		Paleosol carbonate	Wang et al. (1994)
2.28	-2.8	-7.9		Paleosol carbonate	Wang et al. (1994)
2.28	-3.3	-7.6		Paleosol carbonate	Wang et al. (1994)
2.18	-2.7	-8.1		Paleosol carbonate	Wang et al. (1994)
2.08	-2.7	-7.5		Paleosol carbonate	Wang et al. (1994)
1.38	-1	-6.9		Paleosol carbonate	Wang et al. (1994)
1.33	-0.8	-6.5		Paleosol carbonate	Wang et al. (1994)
1.19	-1.7	-6.8		Paleosol carbonate	Wang et al. (1994)
1.09	-1.8	-7.1		Paleosol carbonate	Wang et al. (1994)
0.94	-0.7	-6		Paleosol carbonate	Wang et al. (1994)
0.83	-1.1	-6.6		Paleosol carbonate	Wang et al. (1994)
3.28	-5.2	-5.9		Paleosol carbonate	Wang et al. (1994)
3.22	-5	-5.3		Paleosol carbonate	Wang et al. (1994)
3.06	-6.9	-6.9		Paleosol carbonate	Wang et al. (1994)
2.92	-6.9	-7.3		Paleosol carbonate	Wang et al. (1994)
2.87	-4.7	-7		Paleosol carbonate	Wang et al. (1994)
2.72	-4.9	-8.8		Paleosol carbonate	Wang et al. (1994)
2.67	-4.9	-9		Paleosol carbonate	Wang et al. (1994)
2.65	-5.4	-9.3		Paleosol carbonate	Wang et al. (1994)
12	-8.2			Paleosol carbonate	Fox & Koch (2003)
13	-8.1			Paleosol carbonate	Fox & Koch (2003)
10	-9			Paleosol carbonate	Fox & Koch (2003)
4	-4			Paleosol carbonate	Fox & Koch (2003)
4	-3			Paleosol carbonate	Fox & Koch (2003)
3	-9.8		Bovidae	Enamel	Kita et al. (2014)
3	-9.7		Bovidae	Enamel	Kita et al. (2014)
3	-5.1		Equidae	Enamel	Kita et al. (2014)
3	-5.1		Equidae	Enamel	Kita et al. (2014)
3	-9.2		Bovidae	Enamel	Kita et al. (2014)
10	-10		Equidae	Enamel	Cerling et al. (1997)
9	-9.4		Equidae	Enamel	Cerling et al. (1997)
8	-7.2		Equidae	Enamel	Cerling et al. (1997)
7	-7.4		Equidae	Enamel	Cerling et al. (1997)
6	-9.1		Equidae	Enamel	Cerling et al. (1997)
5	-6.1		Equidae	Enamel	Cerling et al. (1997)
4	-3.4		Equidae	Enamel	Cerling et al. (1997)
3	-3		Equidae	Enamel	Cerling et al. (1997)
2	-1		Equidae	Enamel	Cerling et al. (1997)
1	-1		Equidae	Enamel	Cerling et al. (1997)

## Sheet: South Asia
Waseem et al. (2021). Supplementary tables. AJES, 68, https://doi.org/10.1080/08120099.2021.1893221
Table 5. Compiled carbon and oxygen stable isotope data sets from the Siwalik group.
Indian Region
Age	d13C	d18O	Sample type	Area	Ref.	Family
2.3	-1.9	-5.8	Paleosol carbonate nodule	Siwaliks (India)	Sanyal et al. (2010)
2.3	1.9	-7.3	Paleosol carbonate nodule	Siwaliks (India)	Sanyal et al. (2010)
2.1	1.3	-6.2	Paleosol carbonate nodule	Siwaliks (India)	Sanyal et al. (2010)
2	0	-6.7	Paleosol carbonate nodule	Siwaliks (India)	Sanyal et al. (2010)
1.9	-3.5	-6.5	Paleosol carbonate nodule	Siwaliks (India)	Sanyal et al. (2010)
1.8	-5.8	-7.1	Paleosol carbonate nodule	Siwaliks (India)	Sanyal et al. (2010)
1.7	-3.8	-6.7	Paleosol carbonate nodule	Siwaliks (India)	Sanyal et al. (2010)
2	-0.8	-6.4	Paleosol carbonate nodule	Siwaliks (India)	Sanyal et al. (2010)
1.9	1.8	-6.4	Paleosol carbonate nodule	Siwaliks (India)	Sanyal et al. (2010)
1.1	0.2	-7	Paleosol carbonate nodule	Siwaliks (India)	Sanyal et al. (2010)
9	-11.2	-7.6	Paleosol carbonate nodule	Siwaliks (India)	Patnaik et al. (2014)
9	-10.8	-8.1	Paleosol carbonate nodule	Siwaliks (India)	Patnaik et al. (2014)
9	-11.1	-7.5	Paleosol carbonate nodule	Siwaliks (India)	Patnaik et al. (2014)
9	-11.6	-7.5	Paleosol carbonate nodule	Siwaliks (India)	Patnaik et al. (2014)
9	-12.2	-6.7	Paleosol carbonate nodule	Siwaliks (India)	Patnaik et al. (2014)
9	-11.3	-7.8	Paleosol carbonate nodule	Siwaliks (India)	Patnaik et al. (2014)
9	-10.1	-8	Paleosol carbonate nodule	Siwaliks (India)	Patnaik et al. (2014)
9	-10	-9.2	Paleosol carbonate nodule	Siwaliks (India)	Patnaik et al. (2014)
9	-10.7	-8.1	Paleosol carbonate nodule	Siwaliks (India)	Patnaik et al. (2014)
9	-10.7	-7.9	Paleosol carbonate nodule	Siwaliks (India)	Patnaik et al. (2014)
9	-10.3	-8.2	Paleosol carbonate nodule	Siwaliks (India)	Patnaik et al. (2014)
9	-10	-8.3	Paleosol carbonate nodule	Siwaliks (India)	Patnaik et al. (2014)
9	-10.1	-7.5	Paleosol carbonate nodule	Siwaliks (India)	Patnaik et al. (2014)
9	-10.5	-7.2	Paleosol carbonate nodule	Siwaliks (India)	Patnaik et al. (2014)
9	-8	-5.8	Paleosol carbonate nodule	Siwaliks (India)	Patnaik et al. (2014)
9	-11.3	-7.2	Paleosol carbonate nodule	Siwaliks (India)	Patnaik et al. (2014)
9	-10.8	-7.6	Paleosol carbonate nodule	Siwaliks (India)	Patnaik et al. (2014)
9.1	-11.1	-7.2	Paleosol carbonate nodule	Siwaliks (India)	Patnaik et al. (2014)
9.1	-11.1	-7.4	Paleosol carbonate nodule	Siwaliks (India)	Patnaik et al. (2014)
8.9	-11.2	-7.7	Paleosol carbonate nodule	Siwaliks (India)	Patnaik et al. (2014)
8.9	-11.5	-8.3	Paleosol carbonate nodule	Siwaliks (India)	Patnaik et al. (2014)
10.1	-11	-7.7	Paleosol carbonate nodule	Siwaliks (India)	Patnaik et al. (2014)
10.1	-12	-7.5	Paleosol carbonate nodule	Siwaliks (India)	Patnaik et al. (2014)
10.1	-10.8	-7.2	Paleosol carbonate nodule	Siwaliks (India)	Patnaik et al. (2014)
10.1	-12	-7.1	Paleosol carbonate nodule	Siwaliks (India)	Patnaik et al. (2014)
10.1	-11.2	-8.8	Paleosol carbonate nodule	Siwaliks (India)	Patnaik et al. (2014)
10.1	-10.3	-8.9	Paleosol carbonate nodule	Siwaliks (India)	Patnaik et al. (2014)
17	9.1	-7.6	Paleosol carbonate nodule	Siwaliks (Pakistan)	Quade & Cerling (1995)
16	9.2	-9.6	Paleosol carbonate nodule	Siwaliks (Pakistan)	Quade & Cerling (1995)
16	10	-10.7	Paleosol carbonate nodule	Siwaliks (Pakistan)	Quade & Cerling (1995)
15.1	10	-8.2	Paleosol carbonate nodule	Siwaliks (Pakistan)	Quade & Cerling (1995)
15	11.4	-8.9	Paleosol carbonate nodule	Siwaliks (Pakistan)	Quade & Cerling (1995)
14.3	-9.7	-10.8	Paleosol carbonate nodule	Siwaliks (Pakistan)	Quade & Cerling (1995)
14	-9	-11.9	Paleosol carbonate nodule	Siwaliks (Pakistan)	Quade & Cerling (1995)
14	-9	-10.3	Paleosol carbonate nodule	Siwaliks (Pakistan)	Quade & Cerling (1995)
14	-9.2	-8.7	Paleosol carbonate nodule	Siwaliks (Pakistan)	Quade & Cerling (1995)
14.1	-9.8	-9.3	Paleosol carbonate nodule	Siwaliks (Pakistan)	Quade & Cerling (1995)
13.5	-9.4	-10.4	Paleosol carbonate nodule	Siwaliks (Pakistan)	Quade & Cerling (1995)
12.7	-9.5	-10.6	Paleosol carbonate nodule	Siwaliks (Pakistan)	Quade & Cerling (1995)
12.2	-9.2	-10.2	Paleosol carbonate nodule	Siwaliks (Pakistan)	Quade & Cerling (1995)
12.1	-9.9	-10.6	Paleosol carbonate nodule	Siwaliks (Pakistan)	Quade et al. (1992)
11.7	-9.9	-10.1	Paleosol carbonate nodule	Siwaliks (Pakistan)	Quade & Cerling (1995)
11.1	-9.3	-9.8	Paleosol carbonate nodule	Siwaliks (Pakistan)	Quade & Cerling (1995)
11.1	-10.6	-9.8	Paleosol carbonate nodule	Siwaliks (Pakistan)	Quade & Cerling (1995)
10.5	-9.6	-9.9	Paleosol carbonate nodule	Siwaliks (Pakistan)	Quade & Cerling (1995)
10.3	-10.7	-9.1	Paleosol carbonate nodule	Siwaliks (Pakistan)	Quade & Cerling (1995)
8.9	-9.7	-11	Paleosol carbonate nodule	Siwaliks (Pakistan)	Quade & Cerling (1995)
8.7	-11.3	-10.7	Paleosol carbonate nodule	Siwaliks (Pakistan)	Quade & Cerling (1995)
8.4	-12.6	-5.4	Paleosol carbonate nodule	Siwaliks (Pakistan)	Quade & Cerling (1995)
8.2	-10.6	-7.3	Paleosol carbonate nodule	Siwaliks (Pakistan)	Quade & Cerling (1995)
7.4	-11.5	-7.4	Paleosol carbonate nodule	Siwaliks (Pakistan)	Quade & Cerling (1995)
7.3	-8.9	-7	Paleosol carbonate nodule	Siwaliks (Pakistan)	Quade & Cerling (1995)
6.9	-8.6	-7.1	Paleosol carbonate nodule	Siwaliks (Pakistan)	Quade & Cerling (1995)
6.7	-7.8	-8.1	Paleosol carbonate nodule	Siwaliks (Pakistan)	Quade & Cerling (1995)
6.3	-3.6	-7.1	Paleosol carbonate nodule	Siwaliks (Pakistan)	Quade & Cerling (1995)
5.9	-7.9	-7.6	Paleosol carbonate nodule	Siwaliks (Pakistan)	Quade & Cerling (1995)
5.6	-8.8	-6.5	Paleosol carbonate nodule	Siwaliks (Pakistan)	Quade & Cerling (1995)
3.2	0.6	-6.7	Paleosol carbonate nodule	Siwaliks (Pakistan)	Quade & Cerling (1995)
3.1	0.9	-5.5	Paleosol carbonate nodule	Siwaliks (Pakistan)	Quade & Cerling (1995)
3	0.7	-7.8	Paleosol carbonate nodule	Siwaliks (Pakistan)	Quade & Cerling (1995)
2.8	2	-7.2	Paleosol carbonate nodule	Siwaliks (Pakistan)	Quade & Cerling (1995)
2.6	1.7	-7.5	Paleosol carbonate nodule	Siwaliks (Pakistan)	Quade & Cerling (1995)
2.5	1	-6.2	Paleosol carbonate nodule	Siwaliks (Pakistan)	Quade & Cerling (1995)
2.4	-1.9	-6.8	Paleosol carbonate nodule	Siwaliks (Pakistan)	Quade & Cerling (1995)
2.1	0.4	-6.2	Paleosol carbonate nodule	Siwaliks (Pakistan)	Quade & Cerling (1995)
1.8	0.8	-7	Paleosol carbonate nodule	Siwaliks (Pakistan)	Quade & Cerling (1995)
1.5	2.6	-6	Paleosol carbonate nodule	Siwaliks (Pakistan)	Quade & Cerling (1995)
0.5	-7.2	-8.9	Paleosol carbonate nodule	Siwaliks (Pakistan)	Quade & Cerling (1995)
0.5	-5.6	-6.2	Paleosol carbonate nodule	Siwaliks (Pakistan)	Cerling et al. (1993)
5	-5		Paleosol carbonate nodule	Siwaliks (Pakistan)	Cerling et al. (1993)
5	-5.6		Paleosol carbonate nodule	Siwaliks (Pakistan)	Cerling et al. (1993)
5	-6		Paleosol carbonate nodule	Siwaliks (Pakistan)	Cerling et al. (1993)
6.334	-4.87006	-6.25206	Enamel	Siwaliks (Pakistan)	Morgan et al. (2009)	Artiodactyla
6.427	-4.20421	-5.58921	Enamel	Siwaliks (Pakistan)	Morgan et al. (2009)	Artiodactyla
6.517	-3.79081	-5.16361	Enamel	Siwaliks (Pakistan)	Morgan et al. (2009)	Artiodactyla
6.517	-5.45031	-7.0816	Enamel	Siwaliks (Pakistan)	Morgan et al. (2009)	Artiodactyla
6.967	-5.62807	-2.12941	Enamel	Siwaliks (Pakistan)	Morgan et al. (2009)	Artiodactyla
7.158	-8.11681	-5.60984	Enamel	Siwaliks (Pakistan)	Morgan et al. (2009)	Artiodactyla
7.167	-8.07438	-6.04749	Enamel	Siwaliks (Pakistan)	Morgan et al. (2009)	Artiodactyla
7.362	-5.724	-5.11389	Enamel	Siwaliks (Pakistan)	Morgan et al. (2009)	Artiodactyla
7.809	-11.1095	-5.85514	Enamel	Siwaliks (Pakistan)	Morgan et al. (2009)	Artiodactyla
7.812	-10.1268	-6.94094	Enamel	Siwaliks (Pakistan)	Morgan et al. (2009)	Artiodactyla
7.814	-10.1357	-7.86386	Enamel	Siwaliks (Pakistan)	Morgan et al. (2009)	Artiodactyla
7.84	-12.7257	-7.06818	Enamel	Siwaliks (Pakistan)	Morgan et al. (2009)	Artiodactyla
8.026	-11.9867	-5.21308	Enamel	Siwaliks (Pakistan)	Morgan et al. (2009)	Artiodactyla
8.685	-12.0386	-4.66356	Enamel	Siwaliks (Pakistan)	Morgan et al. (2009)	Artiodactyla
8.747	-11.4108	-6.87347	Enamel	Siwaliks (Pakistan)	Morgan et al. (2009)	Artiodactyla
8.996	-11.1044	-6.65808	Enamel	Siwaliks (Pakistan)	Morgan et al. (2009)	Artiodactyla
8.996	-9.99197	-7.16326	Enamel	Siwaliks (Pakistan)	Morgan et al. (2009)	Artiodactyla
9.248	-8.5	-5.8	Enamel	Siwaliks (Pakistan)	Morgan et al. (2009)	Artiodactyla
9.314	-11.6323	-7.52943	Enamel	Siwaliks (Pakistan)	Morgan et al. (2009)	Artiodactyla
9.329	-11.5338	-6.37609	Enamel	Siwaliks (Pakistan)	Morgan et al. (2009)	Artiodactyla
9.356	-11.3503	-7.83664	Enamel	Siwaliks (Pakistan)	Morgan et al. (2009)	Artiodactyla
9.356	-10.2027	-8.02003	Enamel	Siwaliks (Pakistan)	Morgan et al. (2009)	Artiodactyla
9.399	-12.8947	-3.82687	Enamel	Siwaliks (Pakistan)	Morgan et al. (2009)	Artiodactyla
9.401	-10.5092	-6.64282	Enamel	Siwaliks (Pakistan)	Morgan et al. (2009)	Artiodactyla
9.401	-11.604	-6.24377	Enamel	Siwaliks (Pakistan)	Morgan et al. (2009)	Artiodactyla
9.415	-12.8571	-6.36652	Enamel	Siwaliks (Pakistan)	Morgan et al. (2009)	Artiodactyla
9.621	-12.1309	-7.62407	Enamel	Siwaliks (Pakistan)	Morgan et al. (2009)	Artiodactyla
9.829	-12.7746	-4.25339	Enamel	Siwaliks (Pakistan)	Morgan et al. (2009)	Artiodactyla
10.015	-12.0935	-7.71994	Enamel	Siwaliks (Pakistan)	Morgan et al. (2009)	Artiodactyla
10.063	-11.364	-7.68177	Enamel	Siwaliks (Pakistan)	Morgan et al. (2009)	Artiodactyla
10.063	-11.0147	-5.21967	Enamel	Siwaliks (Pakistan)	Morgan et al. (2009)	Artiodactyla
10.063	-10.7448	-6.89332	Enamel	Siwaliks (Pakistan)	Morgan et al. (2009)	Artiodactyla
10.063	-11.8515	-5.95257	Enamel	Siwaliks (Pakistan)	Morgan et al. (2009)	Artiodactyla
10.222	-10.2023	-6.94671	Enamel	Siwaliks (Pakistan)	Morgan et al. (2009)	Artiodactyla
9.248	-12.0838	-6.93959	Enamel	Siwaliks (Pakistan)	Morgan et al. (2009)	Artiodactyla
9.329	-11.5467	-7.16873	Enamel	Siwaliks (Pakistan)	Morgan et al. (2009)	Artiodactyla
9.415	-12.3256	-5.81353	Enamel	Siwaliks (Pakistan)	Morgan et al. (2009)	Artiodactyla
10.366	-13.0762	-7.87086	Enamel	Siwaliks (Pakistan)	Morgan et al. (2009)	Artiodactyla
7.328	-9.39847	1.94045	Enamel	Siwaliks (Pakistan)	Morgan et al. (2009)	Artiodactyla
7.999	-10.2057	-0.999765	Enamel	Siwaliks (Pakistan)	Morgan et al. (2009)	Artiodactyla
7.999	-10.4374	-2.715	Enamel	Siwaliks (Pakistan)	Morgan et al. (2009)	Artiodactyla
8.056	-9.34146	-3.16382	Enamel	Siwaliks (Pakistan)	Morgan et al. (2009)	Artiodactyla
8.174	-11.3088	-5.5846	Enamel	Siwaliks (Pakistan)	Morgan et al. (2009)	Artiodactyla
9.24	-12.0377	-8.48771	Enamel	Siwaliks (Pakistan)	Morgan et al. (2009)	Artiodactyla
9.269	-10.0957	-4.09853	Enamel	Siwaliks (Pakistan)	Morgan et al. (2009)	Artiodactyla
7.999	-10.205	-1	Enamel	Siwaliks (Pakistan)	Morgan et al. (2009)	Artiodactyla
7.999	-10.7884	-2.05825	Enamel	Siwaliks (Pakistan)	Morgan et al. (2009)	Artiodactyla
8.174	-11.31	-5.585	Enamel	Siwaliks (Pakistan)	Morgan et al. (2009)	Artiodactyla
7.328	-9.4	1.94	Enamel	Siwaliks (Pakistan)	Morgan et al. (2009)	Artiodactyla
7.394	-6.75424	-3.11895	Enamel	Siwaliks (Pakistan)	Morgan et al. (2009)	Artiodactyla
7.338	-6.36	-3.06	Enamel	Siwaliks (Pakistan)	Morgan et al. (2009)	Artiodactyla
7.394	-6.75	-3.12	Enamel	Siwaliks (Pakistan)	Morgan et al. (2009)	Artiodactyla
9.269	-12.733		Enamel	Siwaliks (Pakistan)	Morgan et al. (2009)	Artiodactyla
7.389	-6.59914	-2.45449	Enamel	Siwaliks (Pakistan)	Morgan et al. (2009)	Artiodactyla
7.394	-9.18776	-3.44117	Enamel	Siwaliks (Pakistan)	Morgan et al. (2009)	Artiodactyla
7.414	-9.92968	-5.32769	Enamel	Siwaliks (Pakistan)	Morgan et al. (2009)	Artiodactyla
7.762	-11.2188	-6.78746	Enamel	Siwaliks (Pakistan)	Morgan et al. (2009)	Artiodactyla
7.762	-10.578	-4.45504	Enamel	Siwaliks (Pakistan)	Morgan et al. (2009)	Artiodactyla
7.793	-13.0684	-3.84135	Enamel	Siwaliks (Pakistan)	Morgan et al. (2009)	Artiodactyla
7.809	-9.05281	-3.12403	Enamel	Siwaliks (Pakistan)	Morgan et al. (2009)	Artiodactyla
7.809	-8.76807	-5.61213	Enamel	Siwaliks (Pakistan)	Morgan et al. (2009)	Artiodactyla
7.809	-9.48949	-5.17966	Enamel	Siwaliks (Pakistan)	Morgan et al. (2009)	Artiodactyla
7.81	-9.63969	-4.53382	Enamel	Siwaliks (Pakistan)	Morgan et al. (2009)	Artiodactyla
7.812	-9.98065	-2.37226	Enamel	Siwaliks (Pakistan)	Morgan et al. (2009)	Artiodactyla
7.812	0.993531	-1.53212	Enamel	Siwaliks (Pakistan)	Morgan et al. (2009)	Artiodactyla
7.814	-9.41519	-5.49512	Enamel	Siwaliks (Pakistan)	Morgan et al. (2009)	Artiodactyla
7.814	-9.90494	-3.51581	Enamel	Siwaliks (Pakistan)	Morgan et al. (2009)	Artiodactyla
7.815	-8.958	-3.44698	Enamel	Siwaliks (Pakistan)	Morgan et al. (2009)	Artiodactyla
7.961	-10.378		Enamel	Siwaliks (Pakistan)	Morgan et al. (2009)	Artiodactyla
7.961	-10.5985	-5.65128	Enamel	Siwaliks (Pakistan)	Morgan et al. (2009)	Artiodactyla
8.039	-10.596	-4.73622	Enamel	Siwaliks (Pakistan)	Morgan et al. (2009)	Artiodactyla
8.056	-11.6124	-4.15048	Enamel	Siwaliks (Pakistan)	Morgan et al. (2009)	Artiodactyla
8.056	-10.3491	-3.83608	Enamel	Siwaliks (Pakistan)	Morgan et al. (2009)	Artiodactyla
8.056	-9.79331	-2.42673	Enamel	Siwaliks (Pakistan)	Morgan et al. (2009)	Artiodactyla
8.056	-10.6955	-4.14304	Enamel	Siwaliks (Pakistan)	Morgan et al. (2009)	Artiodactyla
8.056	-10.0906	-1.87187	Enamel	Siwaliks (Pakistan)	Morgan et al. (2009)	Artiodactyla
8.177	-10.1507	-6.93883	Enamel	Siwaliks (Pakistan)	Morgan et al. (2009)	Artiodactyla
8.193	-10.9685	-4.50876	Enamel	Siwaliks (Pakistan)	Morgan et al. (2009)	Artiodactyla
8.213	-10.1747	-6.06149	Enamel	Siwaliks (Pakistan)	Morgan et al. (2009)	Artiodactyla
8.216	-10.0518	-5.64441	Enamel	Siwaliks (Pakistan)	Morgan et al. (2009)	Artiodactyla
8.397	-12.0226	-3.52031	Enamel	Siwaliks (Pakistan)	Morgan et al. (2009)	Artiodactyla
8.397	-11.9008	-7.44144	Enamel	Siwaliks (Pakistan)	Morgan et al. (2009)	Artiodactyla
8.624	-11.6558	-4.05421	Enamel	Siwaliks (Pakistan)	Morgan et al. (2009)	Artiodactyla
7.485	-7.779		Enamel	Siwaliks (Pakistan)	Morgan et al. (2009)	Artiodactyla
8.591	-9.51936	-2.28582	Enamel	Siwaliks (Pakistan)	Morgan et al. (2009)	Artiodactyla
8.891	-11.6479	-5.32	Enamel	Siwaliks (Pakistan)	Morgan et al. (2009)	Artiodactyla
8.891	-12.9107	-6.22172	Enamel	Siwaliks (Pakistan)	Morgan et al. (2009)	Artiodactyla
9.823	-11.7228	-7.82534	Enamel	Siwaliks (Pakistan)	Morgan et al. (2009)	Artiodactyla
10.063	-10.5459	-3.18397	Enamel	Siwaliks (Pakistan)	Morgan et al. (2009)	Artiodactyla
10.063	-11.7559	-3.28956	Enamel	Siwaliks (Pakistan)	Morgan et al. (2009)	Artiodactyla
10.063	-12.291		Enamel	Siwaliks (Pakistan)	Morgan et al. (2009)	Artiodactyla
10.063	-13.302		Enamel	Siwaliks (Pakistan)	Morgan et al. (2009)	Artiodactyla
10.063	-12.288		Enamel	Siwaliks (Pakistan)	Morgan et al. (2009)	Artiodactyla
10.063	-11.4116	-5.84083	Enamel	Siwaliks (Pakistan)	Morgan et al. (2009)	Artiodactyla
10.063	-11.556	-3.13852	Enamel	Siwaliks (Pakistan)	Morgan et al. (2009)	Artiodactyla
6.497	0.471405	-1.31086	Enamel	Siwaliks (Pakistan)	Morgan et al. (2009)	Artiodactyla
6.517	2.92794	3.49794	Enamel	Siwaliks (Pakistan)	Morgan et al. (2009)	Artiodactyla
6.517	3.28861	2.70134	Enamel	Siwaliks (Pakistan)	Morgan et al. (2009)	Artiodactyla
7.21	-6.98193	-3.70323	Enamel	Siwaliks (Pakistan)	Morgan et al. (2009)	Artiodactyla
7.328	2.43351	-3.2948	Enamel	Siwaliks (Pakistan)	Morgan et al. (2009)	Artiodactyla
7.999	-11.0755	-5.08058	Enamel	Siwaliks (Pakistan)	Morgan et al. (2009)	Artiodactyla
7.999	-10.4922	-3.27039	Enamel	Siwaliks (Pakistan)	Morgan et al. (2009)	Artiodactyla
7.999	-10.2709	0.102245	Enamel	Siwaliks (Pakistan)	Morgan et al. (2009)	Artiodactyla
8.056	-11.9969	-1.85385	Enamel	Siwaliks (Pakistan)	Morgan et al. (2009)	Artiodactyla
8.056	-12.428	-6.48102	Enamel	Siwaliks (Pakistan)	Morgan et al. (2009)	Artiodactyla
8.937	-13.541		Enamel	Siwaliks (Pakistan)	Morgan et al. (2009)	Artiodactyla
9.269	-14.095		Enamel	Siwaliks (Pakistan)	Morgan et al. (2009)	Artiodactyla
9.329	-11.5793	-5.11598	Enamel	Siwaliks (Pakistan)	Morgan et al. (2009)	Artiodactyla
9.399	-11.174	-1.84451	Enamel	Siwaliks (Pakistan)	Morgan et al. (2009)	Artiodactyla
9.401	-11.7096	0.305821	Enamel	Siwaliks (Pakistan)	Morgan et al. (2009)	Artiodactyla
10.063	-12.8		Enamel	Siwaliks (Pakistan)	Morgan et al. (2009)	Artiodactyla
10.063	-12.567		Enamel	Siwaliks (Pakistan)	Morgan et al. (2009)	Artiodactyla
8.056	-10.1421	0.890978	Enamel	Siwaliks (Pakistan)	Morgan et al. (2009)	Artiodactyla
8.425	-11.4247	-2.68776	Enamel	Siwaliks (Pakistan)	Morgan et al. (2009)	Artiodactyla
9.24	-13.032	-5.14478	Enamel	Siwaliks (Pakistan)	Morgan et al. (2009)	Artiodactyla
9.356	-12.8965	-8.0113	Enamel	Siwaliks (Pakistan)	Morgan et al. (2009)	Artiodactyla
9.415	-13.0553	-9.18972	Enamel	Siwaliks (Pakistan)	Morgan et al. (2009)	Artiodactyla
9.721	-13.3801	-4.73942	Enamel	Siwaliks (Pakistan)	Morgan et al. (2009)	Artiodactyla
9.729	-13.9394	-8.91829	Enamel	Siwaliks (Pakistan)	Morgan et al. (2009)	Artiodactyla
10.159	-13.6672	-3.0127	Enamel	Siwaliks (Pakistan)	Morgan et al. (2009)	Artiodactyla
7.96	-11.526		Enamel	Siwaliks (Pakistan)	Morgan et al. (2009)	Artiodactyla
7.966	-10.59		Enamel	Siwaliks (Pakistan)	Morgan et al. (2009)	Artiodactyla
8.03	-11.0999	-0.248453	Enamel	Siwaliks (Pakistan)	Morgan et al. (2009)	Artiodactyla
8.116	-11.4521	-0.263205	Enamel	Siwaliks (Pakistan)	Morgan et al. (2009)	Artiodactyla
8.116	-10.9413	-0.893602	Enamel	Siwaliks (Pakistan)	Morgan et al. (2009)	Artiodactyla
8.569	-12.319		Enamel	Siwaliks (Pakistan)	Morgan et al. (2009)	Artiodactyla
8.731	-11.7355	-0.952529	Enamel	Siwaliks (Pakistan)	Morgan et al. (2009)	Artiodactyla
8.792	-11.8037	-4.13413	Enamel	Siwaliks (Pakistan)	Morgan et al. (2009)	Artiodactyla
8.846	-11.774		Enamel	Siwaliks (Pakistan)	Morgan et al. (2009)	Artiodactyla
8.936	-12.5039	-2.06424	Enamel	Siwaliks (Pakistan)	Morgan et al. (2009)	Artiodactyla
8.937	-11.7399	0.0379294	Enamel	Siwaliks (Pakistan)	Morgan et al. (2009)	Artiodactyla
8.996	-11.669	-6.3112	Enamel	Siwaliks (Pakistan)	Morgan et al. (2009)	Artiodactyla
8.996	-11.4955	-4.42961	Enamel	Siwaliks (Pakistan)	Morgan et al. (2009)	Artiodactyla
9.24	-12.0317	-5.69123	Enamel	Siwaliks (Pakistan)	Morgan et al. (2009)	Artiodactyla
9.24	-12.3076	-1.50939	Enamel	Siwaliks (Pakistan)	Morgan et al. (2009)	Artiodactyla
9.248	-10.2487	-3.24898	Enamel	Siwaliks (Pakistan)	Morgan et al. (2009)	Artiodactyla
9.329	-11.9762	-4.76837	Enamel	Siwaliks (Pakistan)	Morgan et al. (2009)	Artiodactyla
9.329	-10.9776	-3.57722	Enamel	Siwaliks (Pakistan)	Morgan et al. (2009)	Artiodactyla
9.341	-10.2022	-1.95279	Enamel	Siwaliks (Pakistan)	Morgan et al. (2009)	Artiodactyla
9.37	-13.1608	-2.03048	Enamel	Siwaliks (Pakistan)	Morgan et al. (2009)	Artiodactyla
9.37	-11.1946	-2.18081	Enamel	Siwaliks (Pakistan)	Morgan et al. (2009)	Artiodactyla
9.399	-14.6352	-2.02556	Enamel	Siwaliks (Pakistan)	Morgan et al. (2009)	Artiodactyla
9.401	-11.0268	-0.236745	Enamel	Siwaliks (Pakistan)	Morgan et al. (2009)	Artiodactyla
9.401	-10.7124	-1.91541	Enamel	Siwaliks (Pakistan)	Morgan et al. (2009)	Artiodactyla
9.401	-11.4266	-4.18374	Enamel	Siwaliks (Pakistan)	Morgan et al. (2009)	Artiodactyla
9.428	-12.5012	-2.18092	Enamel	Siwaliks (Pakistan)	Morgan et al. (2009)	Artiodactyla
9.633	-12.5518	-1.27201	Enamel	Siwaliks (Pakistan)	Morgan et al. (2009)	Artiodactyla
9.729	-12.1015	-4.59307	Enamel	Siwaliks (Pakistan)	Morgan et al. (2009)	Artiodactyla
9.729	-12.7586	-5.61426	Enamel	Siwaliks (Pakistan)	Morgan et al. (2009)	Artiodactyla
10.015	-13.0048	0.0356899	Enamel	Siwaliks (Pakistan)	Morgan et al. (2009)	Artiodactyla
10.015	-11.829	-2.62868	Enamel	Siwaliks (Pakistan)	Morgan et al. (2009)	Artiodactyla
10.063	-10.4205	-5.69196	Enamel	Siwaliks (Pakistan)	Morgan et al. (2009)	Artiodactyla
10.063	-12.0259	-5.86551	Enamel	Siwaliks (Pakistan)	Morgan et al. (2009)	Artiodactyla
10.063	-12.0707	-5.79081	Enamel	Siwaliks (Pakistan)	Morgan et al. (2009)	Artiodactyla
10.063	-11.4803	-4.18116	Enamel	Siwaliks (Pakistan)	Morgan et al. (2009)	Artiodactyla
10.063	-9.92798	-6.80567	Enamel	Siwaliks (Pakistan)	Morgan et al. (2009)	Artiodactyla
10.063	-13		Enamel	Siwaliks (Pakistan)	Morgan et al. (2009)	Artiodactyla
10.063	-11.0498	-3.16061	Enamel	Siwaliks (Pakistan)	Morgan et al. (2009)	Artiodactyla
10.181	-11.8048	-0.824074	Enamel	Siwaliks (Pakistan)	Morgan et al. (2009)	Artiodactyla
10.222	-12.6225	-7.39569	Enamel	Siwaliks (Pakistan)	Morgan et al. (2009)	Artiodactyla
10.356	-11.74	-2	Enamel	Siwaliks (Pakistan)	Morgan et al. (2009)	Artiodactyla
6.66	-7.9		Enamel	Siwaliks (Pakistan)	Morgan et al. (2009)	Artiodactyla
7.328	-10.1711	-0.10002	Enamel	Siwaliks (Pakistan)	Morgan et al. (2009)	Artiodactyla
7.328	-11.0512	2.43778	Enamel	Siwaliks (Pakistan)	Morgan et al. (2009)	Artiodactyla
8.937	-12.2608	2.16097	Enamel	Siwaliks (Pakistan)	Morgan et al. (2009)	Artiodactyla
10.159	-13.227		Enamel	Siwaliks (Pakistan)	Morgan et al. (2009)	Artiodactyla
11.12	-14.0285	-6.4538	Enamel	Siwaliks (Pakistan)	Morgan et al. (2009)	Artiodactyla
11.153	-11.7395	-1.95541	Enamel	Siwaliks (Pakistan)	Morgan et al. (2009)	Artiodactyla
6.334	-7.04235	-5.33889	Enamel	Siwaliks (Pakistan)	Morgan et al. (2009)	Artiodactyla
7.338	-9.13292	-5.62726	Enamel	Siwaliks (Pakistan)	Morgan et al. (2009)	Artiodactyla
7.414	-8.47967	-4.81696	Enamel	Siwaliks (Pakistan)	Morgan et al. (2009)	Artiodactyla
7.58	-6.19159	-2.834	Enamel	Siwaliks (Pakistan)	Morgan et al. (2009)	Artiodactyla
7.809	-10.1391	-5.53755	Enamel	Siwaliks (Pakistan)	Morgan et al. (2009)	Artiodactyla
7.809	-10.8694	-4.88456	Enamel	Siwaliks (Pakistan)	Morgan et al. (2009)	Artiodactyla
7.81	-9.3871	-8.08738	Enamel	Siwaliks (Pakistan)	Morgan et al. (2009)	Artiodactyla
7.812	-10.9071	-4.98603	Enamel	Siwaliks (Pakistan)	Morgan et al. (2009)	Artiodactyla
7.815	-10.2388	-4.73544	Enamel	Siwaliks (Pakistan)	Morgan et al. (2009)	Artiodactyla
7.999	-11.0745	-4.08925	Enamel	Siwaliks (Pakistan)	Morgan et al. (2009)	Artiodactyla
8.056	-10.2793	-0.921649	Enamel	Siwaliks (Pakistan)	Morgan et al. (2009)	Artiodactyla
8.056	-10.8214	3.48802	Enamel	Siwaliks (Pakistan)	Morgan et al. (2009)	Artiodactyla
8.397	-12.2593	-6.90965	Enamel	Siwaliks (Pakistan)	Morgan et al. (2009)	Artiodactyla
8.544	-10.844	-4.01925	Enamel	Siwaliks (Pakistan)	Morgan et al. (2009)	Artiodactyla
8.747	-11.7138	-6.40467	Enamel	Siwaliks (Pakistan)	Morgan et al. (2009)	Artiodactyla
8.937	-11.0669	-4.34097	Enamel	Siwaliks (Pakistan)	Morgan et al. (2009)	Artiodactyla
9.24	-10.7551	-5.09265	Enamel	Siwaliks (Pakistan)	Morgan et al. (2009)	Artiodactyla
9.24	-10.8448	-3.33301	Enamel	Siwaliks (Pakistan)	Morgan et al. (2009)	Artiodactyla
9.252	-11.7234	-9.01959	Enamel	Siwaliks (Pakistan)	Morgan et al. (2009)	Artiodactyla
9.265	-11.9767	-5.9969	Enamel	Siwaliks (Pakistan)	Morgan et al. (2009)	Artiodactyla
9.269	-11.6918	-4.4787	Enamel	Siwaliks (Pakistan)	Morgan et al. (2009)	Artiodactyla
9.269	-11.5139	-4.56046	Enamel	Siwaliks (Pakistan)	Morgan et al. (2009)	Artiodactyla
9.269	-11.2208	-5.68961	Enamel	Siwaliks (Pakistan)	Morgan et al. (2009)	Artiodactyla
9.314	-11.0784	-7.26806	Enamel	Siwaliks (Pakistan)	Morgan et al. (2009)	Artiodactyla
9.329	-12.4641	-5.64297	Enamel	Siwaliks (Pakistan)	Morgan et al. (2009)	Artiodactyla
9.329	-9.38471	-6.99171	Enamel	Siwaliks (Pakistan)	Morgan et al. (2009)	Artiodactyla
9.356	-10.9146	-6.20876	Enamel	Siwaliks (Pakistan)	Morgan et al. (2009)	Artiodactyla
9.396	-8.59528	-4.69969	Enamel	Siwaliks (Pakistan)	Morgan et al. (2009)	Artiodactyla
9.396	-11.3892	-6.58554	Enamel	Siwaliks (Pakistan)	Morgan et al. (2009)	Artiodactyla
9.401	-11.8478	-8.08512	Enamel	Siwaliks (Pakistan)	Morgan et al. (2009)	Artiodactyla
9.482	-11.8051	-7.60998	Enamel	Siwaliks (Pakistan)	Morgan et al. (2009)	Artiodactyla
9.696	-11.7786	-7.47202	Enamel	Siwaliks (Pakistan)	Morgan et al. (2009)	Artiodactyla
10.015	-10.3198	-5.50235	Enamel	Siwaliks (Pakistan)	Morgan et al. (2009)	Artiodactyla
10.015	-11.3534	-5.67503	Enamel	Siwaliks (Pakistan)	Morgan et al. (2009)	Artiodactyla
10.015	-11.8659	-6.56134	Enamel	Siwaliks (Pakistan)	Morgan et al. (2009)	Artiodactyla
10.015	-13.023		Enamel	Siwaliks (Pakistan)	Morgan et al. (2009)	Artiodactyla
10.063	-11.1492	-7.57653	Enamel	Siwaliks (Pakistan)	Morgan et al. (2009)	Artiodactyla
10.063	-9.87017	-5.05874	Enamel	Siwaliks (Pakistan)	Morgan et al. (2009)	Artiodactyla
10.063	-10.4338	-4.83101	Enamel	Siwaliks (Pakistan)	Morgan et al. (2009)	Artiodactyla
10.222	-11.3147	-6.84075	Enamel	Siwaliks (Pakistan)	Morgan et al. (2009)	Artiodactyla
10.486	-10.6301	-5.95062	Enamel	Siwaliks (Pakistan)	Morgan et al. (2009)	Artiodactyla
11.45	-13.239		Enamel	Siwaliks (Pakistan)	Morgan et al. (2009)	Artiodactyla
3.3	-12.5536	-5.37394	Enamel	Siwaliks (Pakistan)	Morgan et al. (2009)	Artiodactyla
7.152	-7.72889	1.34054	Enamel	Siwaliks (Pakistan)	Morgan et al. (2009)	Artiodactyla
7.157	-6.70511	-4.62959	Enamel	Siwaliks (Pakistan)	Morgan et al. (2009)	Artiodactyla
7.245	-8.18397	-3.04697	Enamel	Siwaliks (Pakistan)	Morgan et al. (2009)	Artiodactyla
7.251	-11.7267	-3.32042	Enamel	Siwaliks (Pakistan)	Morgan et al. (2009)	Artiodactyla
7.328	-8.42347	-3.7164	Enamel	Siwaliks (Pakistan)	Morgan et al. (2009)	Artiodactyla
7.328	-7.085	-2.52822	Enamel	Siwaliks (Pakistan)	Morgan et al. (2009)	Artiodactyla
7.414	-10.0089	-7.13516	Enamel	Siwaliks (Pakistan)	Morgan et al. (2009)	Artiodactyla
7.809	-10.6668	-4.35326	Enamel	Siwaliks (Pakistan)	Morgan et al. (2009)	Artiodactyla
7.812	-11.42	-5.53317	Enamel	Siwaliks (Pakistan)	Morgan et al. (2009)	Artiodactyla
7.815	-9.68478	-7.28684	Enamel	Siwaliks (Pakistan)	Morgan et al. (2009)	Artiodactyla
7.84	-11.5136	-7.32442	Enamel	Siwaliks (Pakistan)	Morgan et al. (2009)	Artiodactyla
7.84	-10.1753	-6.76817	Enamel	Siwaliks (Pakistan)	Morgan et al. (2009)	Artiodactyla
7.966	-11.524	-5.08522	Enamel	Siwaliks (Pakistan)	Morgan et al. (2009)	Artiodactyla
7.966	-12.7962	-7.32177	Enamel	Siwaliks (Pakistan)	Morgan et al. (2009)	Artiodactyla
8.056	-10.7544	-2.23902	Enamel	Siwaliks (Pakistan)	Morgan et al. (2009)	Artiodactyla
8.056	-12.0643	-3.87546	Enamel	Siwaliks (Pakistan)	Morgan et al. (2009)	Artiodactyla
8.056	-11.7519	-3.98758	Enamel	Siwaliks (Pakistan)	Morgan et al. (2009)	Artiodactyla
8.056	-9.53983	-1.46853	Enamel	Siwaliks (Pakistan)	Morgan et al. (2009)	Artiodactyla
8.056	-11.0414	-2.65598	Enamel	Siwaliks (Pakistan)	Morgan et al. (2009)	Artiodactyla
8.056	-11.7766	-5.94958	Enamel	Siwaliks (Pakistan)	Morgan et al. (2009)	Artiodactyla
8.056	-10.1876	-3.61129	Enamel	Siwaliks (Pakistan)	Morgan et al. (2009)	Artiodactyla
8.174	-10.5499	-4.98284	Enamel	Siwaliks (Pakistan)	Morgan et al. (2009)	Artiodactyla
8.174	-11.5949	-5.56106	Enamel	Siwaliks (Pakistan)	Morgan et al. (2009)	Artiodactyla
8.425	-11.8257	-4.04935	Enamel	Siwaliks (Pakistan)	Morgan et al. (2009)	Artiodactyla
8.53	-11.584	-2.99533	Enamel	Siwaliks (Pakistan)	Morgan et al. (2009)	Artiodactyla
8.569	-11.6862	-5.14151	Enamel	Siwaliks (Pakistan)	Morgan et al. (2009)	Artiodactyla
8.591	-10.6177	-5.25389	Enamel	Siwaliks (Pakistan)	Morgan et al. (2009)	Artiodactyla
8.657	-11.5986	-5.17207	Enamel	Siwaliks (Pakistan)	Morgan et al. (2009)	Artiodactyla
8.794	-12.1699	-2.8282	Enamel	Siwaliks (Pakistan)	Morgan et al. (2009)	Artiodactyla
8.891	-11.5065	-7.60672	Enamel	Siwaliks (Pakistan)	Morgan et al. (2009)	Artiodactyla
8.916	-11.8581	-4.26699	Enamel	Siwaliks (Pakistan)	Morgan et al. (2009)	Artiodactyla
8.95	-10.9736	-4.46895	Enamel	Siwaliks (Pakistan)	Morgan et al. (2009)	Artiodactyla
8.996	-7.81848	-7.03359	Enamel	Siwaliks (Pakistan)	Morgan et al. (2009)	Artiodactyla
9.023	-11.1865	-5.16599	Enamel	Siwaliks (Pakistan)	Morgan et al. (2009)	Artiodactyla
9.123	-11.9128	-8.4382	Enamel	Siwaliks (Pakistan)	Morgan et al. (2009)	Artiodactyla
9.24	-12.5802	-5.43031	Enamel	Siwaliks (Pakistan)	Morgan et al. (2009)	Artiodactyla
9.24	-11.8841	-5.31057	Enamel	Siwaliks (Pakistan)	Morgan et al. (2009)	Artiodactyla
9.269	-12.7393	-6.89941	Enamel	Siwaliks (Pakistan)	Morgan et al. (2009)	Artiodactyla
9.269	-12.6669	-6.88026	Enamel	Siwaliks (Pakistan)	Morgan et al. (2009)	Artiodactyla
9.333	-11.2489	-8.21807	Enamel	Siwaliks (Pakistan)	Morgan et al. (2009)	Artiodactyla
9.341	-10.336	-5.03038	Enamel	Siwaliks (Pakistan)	Morgan et al. (2009)	Artiodactyla
9.356	-10.737	-5.58067	Enamel	Siwaliks (Pakistan)	Morgan et al. (2009)	Artiodactyla
9.367	-10.3002	-4.65496	Enamel	Siwaliks (Pakistan)	Morgan et al. (2009)	Artiodactyla
9.367	-11.3815	-7.77946	Enamel	Siwaliks (Pakistan)	Morgan et al. (2009)	Artiodactyla
9.396	-11.029	-9.43515	Enamel	Siwaliks (Pakistan)	Morgan et al. (2009)	Artiodactyla
9.401	-11.0355	-5.7342	Enamel	Siwaliks (Pakistan)	Morgan et al. (2009)	Artiodactyla
9.401	-11.7472	-9.18479	Enamel	Siwaliks (Pakistan)	Morgan et al. (2009)	Artiodactyla
9.401	-11.176	-6.48283	Enamel	Siwaliks (Pakistan)	Morgan et al. (2009)	Artiodactyla
9.401	-10.7769	-4.23685	Enamel	Siwaliks (Pakistan)	Morgan et al. (2009)	Artiodactyla
9.415	-11.0315	-6.8996	Enamel	Siwaliks (Pakistan)	Morgan et al. (2009)	Artiodactyla
9.415	-12.8973	-9.15762	Enamel	Siwaliks (Pakistan)	Morgan et al. (2009)	Artiodactyla
9.415	-11.7322	-7.54803	Enamel	Siwaliks (Pakistan)	Morgan et al. (2009)	Artiodactyla
9.415	-10.704	-5.98324	Enamel	Siwaliks (Pakistan)	Morgan et al. (2009)	Artiodactyla
9.577	-12.6397	-6.90348	Enamel	Siwaliks (Pakistan)	Morgan et al. (2009)	Artiodactyla
9.579	-10.9309	-7.9005	Enamel	Siwaliks (Pakistan)	Morgan et al. (2009)	Artiodactyla
9.621	-11.99	-5.80321	Enamel	Siwaliks (Pakistan)	Morgan et al. (2009)	Artiodactyla
9.762	-11.7444	-8.62899	Enamel	Siwaliks (Pakistan)	Morgan et al. (2009)	Artiodactyla
10.063	-11.3412	-6.43441	Enamel	Siwaliks (Pakistan)	Morgan et al. (2009)	Artiodactyla
10.063	-10.3476	-7.19737	Enamel	Siwaliks (Pakistan)	Morgan et al. (2009)	Artiodactyla
10.063	-10.2576	-8.79529	Enamel	Siwaliks (Pakistan)	Morgan et al. (2009)	Artiodactyla
10.222	-10.5801	-8.23458	Enamel	Siwaliks (Pakistan)	Morgan et al. (2009)	Artiodactyla
9.367	-12.7927	-3.3883	Enamel	Siwaliks (Pakistan)	Morgan et al. (2009)	Artiodactyla
9.692	-11.0692	-2.96478	Enamel	Siwaliks (Pakistan)	Morgan et al. (2009)	Artiodactyla
10.015	-11.4628	-5.26511	Enamel	Siwaliks (Pakistan)	Morgan et al. (2009)	Artiodactyla
10.015	-11.2813	-7.38175	Enamel	Siwaliks (Pakistan)	Morgan et al. (2009)	Artiodactyla
9.356	-9.91327	-1.57284	Enamel	Siwaliks (Pakistan)	Morgan et al. (2009)	Artiodactyla
9.401	-11.0428	-6.52652	Enamel	Siwaliks (Pakistan)	Morgan et al. (2009)	Artiodactyla
9.401	-10.6059	-2.36747	Enamel	Siwaliks (Pakistan)	Morgan et al. (2009)	Artiodactyla
7.389	-9.93431	-5.58921	Enamel	Siwaliks (Pakistan)	Morgan et al. (2009)	Artiodactyla
7.414	-10.2286	-1.65538	Enamel	Siwaliks (Pakistan)	Morgan et al. (2009)	Artiodactyla
7.414	-10.7072	-3.05386	Enamel	Siwaliks (Pakistan)	Morgan et al. (2009)	Artiodactyla
7.389	-7.26495	-1.90124	Enamel	Siwaliks (Pakistan)	Morgan et al. (2009)	Artiodactyla
8.026	-10.5919	-1.73584	Enamel	Siwaliks (Pakistan)	Morgan et al. (2009)	Artiodactyla
8.039	-10.479	-2.38223	Enamel	Siwaliks (Pakistan)	Morgan et al. (2009)	Artiodactyla
8.056	-8.84359	-2.52958	Enamel	Siwaliks (Pakistan)	Morgan et al. (2009)	Artiodactyla
8.056	-9.88454	-2.36747	Enamel	Siwaliks (Pakistan)	Morgan et al. (2009)	Artiodactyla
8.174	-10.4765	-3.78251	Enamel	Siwaliks (Pakistan)	Morgan et al. (2009)	Artiodactyla
9.333	-10.532	-3.58385	Enamel	Siwaliks (Pakistan)	Morgan et al. (2009)	Artiodactyla
9.356	-11.0879	-5.63337	Enamel	Siwaliks (Pakistan)	Morgan et al. (2009)	Artiodactyla
9.399	-10.6123	-2.19619	Enamel	Siwaliks (Pakistan)	Morgan et al. (2009)	Artiodactyla
9.401	-12.6777	0.458257	Enamel	Siwaliks (Pakistan)	Morgan et al. (2009)	Artiodactyla
9.401	-10.638	-8.27691	Enamel	Siwaliks (Pakistan)	Morgan et al. (2009)	Artiodactyla
9.401	-11.1469	-8.17184	Enamel	Siwaliks (Pakistan)	Morgan et al. (2009)	Artiodactyla
8.425	-10.9038	-2.37363	Enamel	Siwaliks (Pakistan)	Morgan et al. (2009)	Perissodactyla
9.24	-11.0601	-3.84446	Enamel	Siwaliks (Pakistan)	Morgan et al. (2009)	Perissodactyla
9.33	-10.9819	-3.28488	Enamel	Siwaliks (Pakistan)	Morgan et al. (2009)	Perissodactyla
9.577	-11.7811	-3.86528	Enamel	Siwaliks (Pakistan)	Morgan et al. (2009)	Perissodactyla
9.729	-11.6799	-1.04098	Enamel	Siwaliks (Pakistan)	Morgan et al. (2009)	Perissodactyla
10.063	-11.9078	-0.763013	Enamel	Siwaliks (Pakistan)	Morgan et al. (2009)	Perissodactyla
6.48	-3.45333	1.12667	Enamel	Siwaliks (Pakistan)	Morgan et al. (2009)	Perissodactyla
7.113	-6.26122	-3.61723	Enamel	Siwaliks (Pakistan)	Morgan et al. (2009)	Perissodactyla
7.113	-6.71765	-1.61765	Enamel	Siwaliks (Pakistan)	Morgan et al. (2009)	Perissodactyla
7.157	-6.50065	-2.14165	Enamel	Siwaliks (Pakistan)	Morgan et al. (2009)	Perissodactyla
7.167	-6.52436	-0.304555	Enamel	Siwaliks (Pakistan)	Morgan et al. (2009)	Perissodactyla
7.245	-6.86793	-1.99782	Enamel	Siwaliks (Pakistan)	Morgan et al. (2009)	Perissodactyla
7.245	-7.55186	0.101332	Enamel	Siwaliks (Pakistan)	Morgan et al. (2009)	Perissodactyla
7.338	-6.00444	-0.219967	Enamel	Siwaliks (Pakistan)	Morgan et al. (2009)	Perissodactyla
7.338	-5.7	1.22667	Enamel	Siwaliks (Pakistan)	Morgan et al. (2009)	Perissodactyla
7.352	-3.96131	-0.614015	Enamel	Siwaliks (Pakistan)	Morgan et al. (2009)	Perissodactyla
7.353	-6.95374	-3.88457	Enamel	Siwaliks (Pakistan)	Morgan et al. (2009)	Perissodactyla
7.362	-2.17875	2.31391	Enamel	Siwaliks (Pakistan)	Morgan et al. (2009)	Perissodactyla
7.411	-7.143		Enamel	Siwaliks (Pakistan)	Morgan et al. (2009)	Perissodactyla
7.433	-3.653		Enamel	Siwaliks (Pakistan)	Morgan et al. (2009)	Perissodactyla
7.734	-4.97857	0.385714	Enamel	Siwaliks (Pakistan)	Morgan et al. (2009)	Perissodactyla
7.814	-6.441	-2.731	Enamel	Siwaliks (Pakistan)	Morgan et al. (2009)	Perissodactyla
7.814	-5.40589	-6.10665	Enamel	Siwaliks (Pakistan)	Morgan et al. (2009)	Perissodactyla
7.815	-10.1245	-4.13569	Enamel	Siwaliks (Pakistan)	Morgan et al. (2009)	Perissodactyla
7.878	-1.41875	-0.55625	Enamel	Siwaliks (Pakistan)	Morgan et al. (2009)	Perissodactyla
7.911	-4.121	3.215	Enamel	Siwaliks (Pakistan)	Morgan et al. (2009)	Perissodactyla
7.966	-11.0176	-2.68153	Enamel	Siwaliks (Pakistan)	Morgan et al. (2009)	Perissodactyla
7.999	-9.04668	-2.5371	Enamel	Siwaliks (Pakistan)	Morgan et al. (2009)	Perissodactyla
8.026	-6.54545	-0.822727	Enamel	Siwaliks (Pakistan)	Morgan et al. (2009)	Perissodactyla
8.026	-9.13422	-4.12279	Enamel	Siwaliks (Pakistan)	Morgan et al. (2009)	Perissodactyla
8.056	-7.07601	0.31491	Enamel	Siwaliks (Pakistan)	Morgan et al. (2009)	Perissodactyla
8.056	-5.286	-1.321	Enamel	Siwaliks (Pakistan)	Morgan et al. (2009)	Perissodactyla
8.056	-5.925	-2.738	Enamel	Siwaliks (Pakistan)	Morgan et al. (2009)	Perissodactyla
8.056	-8.63674	-2.50162	Enamel	Siwaliks (Pakistan)	Morgan et al. (2009)	Perissodactyla
8.368	-4.70668	-3.14888	Enamel	Siwaliks (Pakistan)	Morgan et al. (2009)	Perissodactyla
8.368	-6.11579	-4.49474	Enamel	Siwaliks (Pakistan)	Morgan et al. (2009)	Perissodactyla
8.397	-3.60178	1.72637	Enamel	Siwaliks (Pakistan)	Morgan et al. (2009)	Perissodactyla
8.417	-10.8103	-5.14655	Enamel	Siwaliks (Pakistan)	Morgan et al. (2009)	Perissodactyla
8.498	-7.94286	-2.20714	Enamel	Siwaliks (Pakistan)	Morgan et al. (2009)	Perissodactyla
8.544	-10.9829	-4.51735	Enamel	Siwaliks (Pakistan)	Morgan et al. (2009)	Perissodactyla
8.569	-7.32679	-2.06227	Enamel	Siwaliks (Pakistan)	Morgan et al. (2009)	Perissodactyla
8.569	-7.127	-2.47	Enamel	Siwaliks (Pakistan)	Morgan et al. (2009)	Perissodactyla
8.569	-6.21485	-1.34834	Enamel	Siwaliks (Pakistan)	Morgan et al. (2009)	Perissodactyla
8.569	-5.87937	-1.46543	Enamel	Siwaliks (Pakistan)	Morgan et al. (2009)	Perissodactyla
8.595	-10.0067	-5.06667	Enamel	Siwaliks (Pakistan)	Morgan et al. (2009)	Perissodactyla
8.731	-8.8		Enamel	Siwaliks (Pakistan)	Morgan et al. (2009)	Perissodactyla
8.739	-4.44917	-1.00432	Enamel	Siwaliks (Pakistan)	Morgan et al. (2009)	Perissodactyla
8.739	-3.80769	-1.46154	Enamel	Siwaliks (Pakistan)	Morgan et al. (2009)	Perissodactyla
8.747	-9.61672	-5.14966	Enamel	Siwaliks (Pakistan)	Morgan et al. (2009)	Perissodactyla
8.792	-9.83458	-5.70572	Enamel	Siwaliks (Pakistan)	Morgan et al. (2009)	Perissodactyla
8.799	-11.062	-2.435	Enamel	Siwaliks (Pakistan)	Morgan et al. (2009)	Perissodactyla
8.992	-7.11956	-1.57492	Enamel	Siwaliks (Pakistan)	Morgan et al. (2009)	Perissodactyla
9.101	-11.05	-3.22143	Enamel	Siwaliks (Pakistan)	Morgan et al. (2009)	Perissodactyla
9.24	-11.4046	-2.83747	Enamel	Siwaliks (Pakistan)	Morgan et al. (2009)	Perissodactyla
9.248	-10.9295	-4.99302	Enamel	Siwaliks (Pakistan)	Morgan et al. (2009)	Perissodactyla
9.252	-9.5695	-4.899	Enamel	Siwaliks (Pakistan)	Morgan et al. (2009)	Perissodactyla
9.265	-11.6144	-3.87238	Enamel	Siwaliks (Pakistan)	Morgan et al. (2009)	Perissodactyla
9.269	-11.58		Enamel	Siwaliks (Pakistan)	Morgan et al. (2009)	Perissodactyla
9.269	-12.262		Enamel	Siwaliks (Pakistan)	Morgan et al. (2009)	Perissodactyla
9.329	-10.9318	-4.86301	Enamel	Siwaliks (Pakistan)	Morgan et al. (2009)	Perissodactyla
9.329	-10.962	-6.35797	Enamel	Siwaliks (Pakistan)	Morgan et al. (2009)	Perissodactyla
9.399	-9.19333	-1.59333	Enamel	Siwaliks (Pakistan)	Morgan et al. (2009)	Perissodactyla
9.399	-9.539	-1.491	Enamel	Siwaliks (Pakistan)	Morgan et al. (2009)	Perissodactyla
9.399	-8.073	-2.636	Enamel	Siwaliks (Pakistan)	Morgan et al. (2009)	Perissodactyla
9.399	-5.11379	-3.86823	Enamel	Siwaliks (Pakistan)	Morgan et al. (2009)	Perissodactyla
9.399	-11.2827	-5.87759	Enamel	Siwaliks (Pakistan)	Morgan et al. (2009)	Perissodactyla
9.401	-10.0548	-3.61203	Enamel	Siwaliks (Pakistan)	Morgan et al. (2009)	Perissodactyla
9.415	-11.0932	-4.27104	Enamel	Siwaliks (Pakistan)	Morgan et al. (2009)	Perissodactyla
9.577	-12.52		Enamel	Siwaliks (Pakistan)	Morgan et al. (2009)	Perissodactyla
9.577	-13.464		Enamel	Siwaliks (Pakistan)	Morgan et al. (2009)	Perissodactyla
9.676	-12.591	-4.155	Enamel	Siwaliks (Pakistan)	Morgan et al. (2009)	Perissodactyla
9.692	-9.02146	-2.1899	Enamel	Siwaliks (Pakistan)	Morgan et al. (2009)	Perissodactyla
9.692	-7.57277	-2.23058	Enamel	Siwaliks (Pakistan)	Morgan et al. (2009)	Perissodactyla
9.692	-7.90536	-3.08637	Enamel	Siwaliks (Pakistan)	Morgan et al. (2009)	Perissodactyla
9.721	-10.3494	-7.93043	Enamel	Siwaliks (Pakistan)	Morgan et al. (2009)	Perissodactyla
9.762	-10.626		Enamel	Siwaliks (Pakistan)	Morgan et al. (2009)	Perissodactyla
9.762	-10.687		Enamel	Siwaliks (Pakistan)	Morgan et al. (2009)	Perissodactyla
9.762	-12.4933	-4.90667	Enamel	Siwaliks (Pakistan)	Morgan et al. (2009)	Perissodactyla
9.765	-12.4464	-2.88102	Enamel	Siwaliks (Pakistan)	Morgan et al. (2009)	Perissodactyla
9.849	-11.7671	-2.11759	Enamel	Siwaliks (Pakistan)	Morgan et al. (2009)	Perissodactyla
10.015	-10.7248	-2.24525	Enamel	Siwaliks (Pakistan)	Morgan et al. (2009)	Perissodactyla
10.015	-11.391		Enamel	Siwaliks (Pakistan)	Morgan et al. (2009)	Perissodactyla
10.063	-11.6889	-5.31111	Enamel	Siwaliks (Pakistan)	Morgan et al. (2009)	Perissodactyla
10.063	-11.332	-4.65181	Enamel	Siwaliks (Pakistan)	Morgan et al. (2009)	Perissodactyla
10.063	-10.7486	-6.93759	Enamel	Siwaliks (Pakistan)	Morgan et al. (2009)	Perissodactyla
10.063	-9.064	-9.15429	Enamel	Siwaliks (Pakistan)	Morgan et al. (2009)	Perissodactyla
10.063	-12.116		Enamel	Siwaliks (Pakistan)	Morgan et al. (2009)	Perissodactyla
10.063	-9.74057	-5.50038	Enamel	Siwaliks (Pakistan)	Morgan et al. (2009)	Perissodactyla
10.063	-9.26245	-5.76017	Enamel	Siwaliks (Pakistan)	Morgan et al. (2009)	Perissodactyla
10.063	-8.978	-4.36	Enamel	Siwaliks (Pakistan)	Morgan et al. (2009)	Perissodactyla
10.159	-8.30568	-1.29516	Enamel	Siwaliks (Pakistan)	Morgan et al. (2009)	Perissodactyla
10.159	-8.76	-0.806667	Enamel	Siwaliks (Pakistan)	Morgan et al. (2009)	Perissodactyla
10.159	-9.18142	-0.912342	Enamel	Siwaliks (Pakistan)	Morgan et al. (2009)	Perissodactyla
10.222	-8.913		Enamel	Siwaliks (Pakistan)	Morgan et al. (2009)	Perissodactyla
10.222	-8.891		Enamel	Siwaliks (Pakistan)	Morgan et al. (2009)	Perissodactyla
10.356	-11.252	-4.77	Enamel	Siwaliks (Pakistan)	Morgan et al. (2009)	Perissodactyla
8.747	-12.7763	-4.13634	Enamel	Siwaliks (Pakistan)	Morgan et al. (2009)	Primates
9.24	-13.8742	-5.98131	Enamel	Siwaliks (Pakistan)	Morgan et al. (2009)	Primates
9.24	-12.7614	-1.66786	Enamel	Siwaliks (Pakistan)	Morgan et al. (2009)	Primates
9.248	-12.4087	-0.926332	Enamel	Siwaliks (Pakistan)	Morgan et al. (2009)	Primates
9.269	-13.1191	-1.90094	Enamel	Siwaliks (Pakistan)	Morgan et al. (2009)	Primates
9.401	-12.6921	-2.72114	Enamel	Siwaliks (Pakistan)	Morgan et al. (2009)	Primates
8.056	-11.7176	0.0105271	Enamel	Siwaliks (Pakistan)	Morgan et al. (2009)	Proboscidea
10.015	-12.22		Enamel	Siwaliks (Pakistan)	Morgan et al. (2009)	Proboscidea
10.063	-9.63358	-8.47204	Enamel	Siwaliks (Pakistan)	Morgan et al. (2009)	Proboscidea
10.222	-9.90634	-5.00388	Enamel	Siwaliks (Pakistan)	Morgan et al. (2009)	Proboscidea
13	-12.44	-9.04	Enamel	Siwaliks (India)	Patnaik et al. (2019)	Bovidae
13.2	-13.09	-8.55	Enamel	Siwaliks (India)	Patnaik et al. (2019)	Bovidae
13.2	-13.05	-5.78	Enamel	Siwaliks (India)	Patnaik et al. (2019)	Bovidae
11	2.21	0.7	Enamel	Siwaliks (India)	Patnaik et al. (2019)	Bovidae
9.5	-14.64	-7.04	Enamel	Siwaliks (India)	Patnaik et al. (2019)	Bovidae
9.5	-12.31	0.6	Enamel	Siwaliks (India)	Patnaik et al. (2019)	Bovidae
9.5	-13.3	-4.4	Enamel	Siwaliks (India)	Patnaik et al. (2019)	Bovidae
9.5	-12.77	-5.72	Enamel	Siwaliks (India)	Patnaik et al. (2019)	Bovidae
9.5	-13.8	-11.77	Enamel	Siwaliks (India)	Patnaik et al. (2019)	Bovidae
9.5	-12.86	-7.51	Enamel	Siwaliks (India)	Patnaik et al. (2019)	Bovidae
9.5	-15.58	-9.78	Enamel	Siwaliks (India)	Patnaik et al. (2019)	Bovidae
2.6	2.11	-4.05	Enamel	Siwaliks (India)	Patnaik et al. (2019)	Bovidae
2.6	-1.91	-7.74	Enamel	Siwaliks (India)	Patnaik et al. (2019)	Bovidae
2.6	-0.99	-6.2	Enamel	Siwaliks (India)	Patnaik et al. (2019)	Bovidae
2.6	-11.67	-6.9	Enamel	Siwaliks (India)	Patnaik et al. (2019)	Bovidae
2.6	1.83	-0.95	Enamel	Siwaliks (India)	Patnaik et al. (2019)	Bovidae
2.6	-4.49	-0.55	Enamel	Siwaliks (India)	Patnaik et al. (2019)	Bovidae
2.6	0.04	-3.41	Enamel	Siwaliks (India)	Patnaik et al. (2019)	Bovidae
2.6	1.69	-0.14	Enamel	Siwaliks (India)	Patnaik et al. (2019)	Bovidae
3	0.2	-5.21	Enamel	Siwaliks (India)	Patnaik et al. (2019)	Bovidae
2.3	1.81	-3.18	Enamel	Siwaliks (India)	Patnaik et al. (2019)	Bovidae
2.3	-0.28	-4.37	Enamel	Siwaliks (India)	Patnaik et al. (2019)	Bovidae
2.3	-0.57	-4.5	Enamel	Siwaliks (India)	Patnaik et al. (2019)	Bovidae
2.3	1.31	-2.75	Enamel	Siwaliks (India)	Patnaik et al. (2019)	Bovidae
2.3	-11.24	-0.21	Enamel	Siwaliks (India)	Patnaik et al. (2019)	Bovidae
2.3	-2.21	-9.38	Enamel	Siwaliks (India)	Patnaik et al. (2019)	Bovidae
2.3	2.13	-1.03	Enamel	Siwaliks (India)	Patnaik et al. (2019)	Bovidae
2.3	3.4	-5.02	Enamel	Siwaliks (India)	Patnaik et al. (2019)	Bovidae
2.3	0.65	-7.46	Enamel	Siwaliks (India)	Patnaik et al. (2019)	Bovidae
2.3	0.11	-2.08	Enamel	Siwaliks (India)	Patnaik et al. (2019)	Bovidae
1.8	1.5	-0.31	Enamel	Siwaliks (India)	Patnaik et al. (2019)	Bovidae
1.8	0.83	-7.28	Enamel	Siwaliks (India)	Patnaik et al. (2019)	Bovidae
1.8	-1.91	-1.92	Enamel	Siwaliks (India)	Patnaik et al. (2019)	Bovidae
1.8	2.14	-2.6	Enamel	Siwaliks (India)	Patnaik et al. (2019)	Bovidae
1.8	2	-5.78	Enamel	Siwaliks (India)	Patnaik et al. (2019)	Bovidae
1.8	-3.05	-4.55	Enamel	Siwaliks (India)	Patnaik et al. (2019)	Bovidae
1.8	1.53	-5.39	Enamel	Siwaliks (India)	Patnaik et al. (2019)	Bovidae
~1 Ma	0.08	-3.79	Enamel	Siwaliks (India)	Patnaik et al. (2019)	Bovidae
1	0.96	-3.54	Enamel	Siwaliks (India)	Patnaik et al. (2019)	Bovidae
1	0.18	-3.51	Enamel	Siwaliks (India)	Patnaik et al. (2019)	Bovidae
1	1.26	-0.96	Enamel	Siwaliks (India)	Patnaik et al. (2019)	Bovidae
1	2	-3.95	Enamel	Siwaliks (India)	Patnaik et al. (2019)	Bovidae
1	2.77	-0.78	Enamel	Siwaliks (India)	Patnaik et al. (2019)	Bovidae
1	2.02	-1.94	Enamel	Siwaliks (India)	Patnaik et al. (2019)	Bovidae
1	0.67	0.36	Enamel	Siwaliks (India)	Patnaik et al. (2019)	Bovidae
1	0.29	-4.15	Enamel	Siwaliks (India)	Patnaik et al. (2019)	Bovidae
1	-12.92	-4.31	Enamel	Siwaliks (India)	Patnaik et al. (2019)	Bovidae
13.2	-13.92	-12.75	Enamel	Siwaliks (India)	Patnaik et al. (2019)	Rhinocerotidae
13.2	-11.92	-10.16	Enamel	Siwaliks (India)	Patnaik et al. (2019)	Rhinocerotidae
13.2	-11.74	-9.41	Enamel	Siwaliks (India)	Patnaik et al. (2019)	Rhinocerotidae
13.2	-12.42	-6.67	Enamel	Siwaliks (India)	Patnaik et al. (2019)	Rhinocerotidae
13.2	-13.98	-11.77	Enamel	Siwaliks (India)	Patnaik et al. (2019)	Rhinocerotidae
11	-13.48	-8.15	Enamel	Siwaliks (India)	Patnaik et al. (2019)	Rhinocerotidae
9.5	-13.72	-7.01	Enamel	Siwaliks (India)	Patnaik et al. (2019)	Rhinocerotidae
9.5	-13.19	-8.65	Enamel	Siwaliks (India)	Patnaik et al. (2019)	Rhinocerotidae
9.5	-11.62	-6.12	Enamel	Siwaliks (India)	Patnaik et al. (2019)	Rhinocerotidae
9.5	-13.64	-11.77	Enamel	Siwaliks (India)	Patnaik et al. (2019)	Rhinocerotidae
6.5	-14.26	-7.91	Enamel	Siwaliks (India)	Patnaik et al. (2019)	Rhinocerotidae
2.25	0.9	-3.14	Enamel	Siwaliks (India)	Patnaik et al. (2019)	Rhinocerotidae
2.25	-2.97	-6.43	Enamel	Siwaliks (India)	Patnaik et al. (2019)	Rhinocerotidae
1.8	0.13	-6.83	Enamel	Siwaliks (India)	Patnaik et al. (2019)	Rhinocerotidae
1.5	0.83	-2.01	Enamel	Siwaliks (India)	Patnaik et al. (2019)	Rhinocerotidae
1.5	0.3	-1.25	Enamel	Siwaliks (India)	Patnaik et al. (2019)	Rhinocerotidae
1.5	-0.79	-6.2	Enamel	Siwaliks (India)	Patnaik et al. (2019)	Rhinocerotidae
1	0.18	-1.7	Enamel	Siwaliks (India)	Patnaik et al. (2019)	Rhinocerotidae
13.2	-13.19	-7.5	Enamel	Siwaliks (India)	Patnaik et al. (2019)	Giraffidae
13.2	-13.08	-9.76	Enamel	Siwaliks (India)	Patnaik et al. (2019)	Giraffidae
2.6	1.41	0.02	Enamel	Siwaliks (India)	Patnaik et al. (2019)	Giraffidae
2.6	3.09	-1.49	Enamel	Siwaliks (India)	Patnaik et al. (2019)	Giraffidae
2.6	2.9	-0.82	Enamel	Siwaliks (India)	Patnaik et al. (2019)	Giraffidae
2.6	0.28	-2.04	Enamel	Siwaliks (India)	Patnaik et al. (2019)	Giraffidae
2.5-2 Ma	-1.96	-4.89	Enamel	Siwaliks (India)	Patnaik et al. (2019)	Giraffidae
2.5-2 Ma	3.24	-1.71	Enamel	Siwaliks (India)	Patnaik et al. (2019)	Giraffidae
2.25	-0.21	-1.47	Enamel	Siwaliks (India)	Patnaik et al. (2019)	Giraffidae
2.25	3.1	-3.71	Enamel	Siwaliks (India)	Patnaik et al. (2019)	Giraffidae
2.25	2.59	-3.61	Enamel	Siwaliks (India)	Patnaik et al. (2019)	Giraffidae
2	1.88	-0.77	Enamel	Siwaliks (India)	Patnaik et al. (2019)	Giraffidae
13.2	-10.96	-3.02	Enamel	Siwaliks (India)	Patnaik et al. (2019)	Tragulidae
13.2	-11.66	-4.3	Enamel	Siwaliks (India)	Patnaik et al. (2019)	Tragulidae
13.2	-11.88	-6.62	Enamel	Siwaliks (India)	Patnaik et al. (2019)	Tragulidae
13.2	-12.93	-8.34	Enamel	Siwaliks (India)	Patnaik et al. (2019)	Tragulidae
13.2	-13.02	-12.5	Enamel	Siwaliks (India)	Patnaik et al. (2019)	Tragulidae
13.2	-11.87	-8.51	Enamel	Siwaliks (India)	Patnaik et al. (2019)	Tragulidae
13.2	-12.39	-6.87	Enamel	Siwaliks (India)	Patnaik et al. (2019)	Tragulidae
9.5	-11.11	-8.07	Enamel	Siwaliks (India)	Patnaik et al. (2019)	Tragulidae
9.5	-12.89	-4.99	Enamel	Siwaliks (India)	Patnaik et al. (2019)	Tragulidae
9.5	-13	-11.94	Enamel	Siwaliks (India)	Patnaik et al. (2019)	Tragulidae
9.5	-11.98	-6.06	Enamel	Siwaliks (India)	Patnaik et al. (2019)	Tragulidae
2.8	-1.99	-0.1	Enamel	Siwaliks (India)	Patnaik et al. (2019)	Tragulidae
3	-9.03	-4.2	Enamel	Siwaliks (India)	Patnaik et al. (2019)	Cervidae
2.6	0.12	-0.72	Enamel	Siwaliks (India)	Patnaik et al. (2019)	Cervidae
2	1.23	0.55	Enamel	Siwaliks (India)	Patnaik et al. (2019)	Cervidae
1.5	0.51	-4.22	Enamel	Siwaliks (India)	Patnaik et al. (2019)	Cervidae
2.25	2.27	-5.18	Enamel	Siwaliks (India)	Patnaik et al. (2019)	Cervidae
6.5	-10.81	-7.27	Enamel	Siwaliks (India)	Patnaik et al. (2019)	Equidae
3.5	-2.37	-4.49	Enamel	Siwaliks (India)	Patnaik et al. (2019)	Equidae
2.8	-0.62	-1.94	Enamel	Siwaliks (India)	Patnaik et al. (2019)	Equidae
2	-1.32	-3.38	Enamel	Siwaliks (India)	Patnaik et al. (2019)	Equidae
2	0.84	-0.76	Enamel	Siwaliks (India)	Patnaik et al. (2019)	Equidae
2	-2	-6.51	Enamel	Siwaliks (India)	Patnaik et al. (2019)	Equidae
2	1.49	-1.44	Enamel	Siwaliks (India)	Patnaik et al. (2019)	Equidae
1	0.49	-2.85	Enamel	Siwaliks (India)	Patnaik et al. (2019)	Equidae
1	-0.17	-2.75	Enamel	Siwaliks (India)	Patnaik et al. (2019)	Equidae
1	0.76	-3.94	Enamel	Siwaliks (India)	Patnaik et al. (2019)	Equidae
1	-0.03	-2.24	Enamel	Siwaliks (India)	Patnaik et al. (2019)	Equidae
1	0.74	-1.38	Enamel	Siwaliks (India)	Patnaik et al. (2019)	Equidae
1	-2.83	-6.73	Enamel	Siwaliks (India)	Patnaik et al. (2019)	Equidae
1	-0.37	-3.11	Enamel	Siwaliks (India)	Patnaik et al. (2019)	Equidae
0.5	-1.26	-0.39	Enamel	Siwaliks (India)	Patnaik et al. (2019)	Equidae
13.2	-10.79	-13.64	Enamel	Siwaliks (India)	Patnaik et al. (2019)	Suidae
9.5	-10.5	-7.96	Enamel	Siwaliks (India)	Patnaik et al. (2019)	Suidae
4	-11.63	-12.06	Enamel	Siwaliks (India)	Patnaik et al. (2019)	Suidae
2.6	-10.84	-10.58	Enamel	Siwaliks (India)	Patnaik et al. (2019)	Suidae
2.6	-7.59	-5.69	Enamel	Siwaliks (India)	Patnaik et al. (2019)	Suidae
1	-4.68	-3.6	Enamel	Siwaliks (India)	Patnaik et al. (2019)	Suidae
1.6	-2.4	-6.6	Enamel	Siwaliks (India)	Patnaik et al. (2019)	Equidae
1.8	0.9	-4.4	Enamel	Siwaliks (India)	Patnaik et al. (2019)	Giraffidae
1.8	-1.9	-5.5	Enamel	Siwaliks (India)	Patnaik et al. (2019)	Elephantidae
1.8	-2.9		Enamel	Siwaliks (India)	Patnaik et al. (2019)	Hippopotamidae
3.1	-0.1	-5.8	Enamel	Siwaliks (India)	Patnaik et al. (2019)	Elephantidae
3.1	-0.6	-5.7	Enamel	Siwaliks (India)	Patnaik et al. (2019)	Elephantidae
3.1	-0.4	-8.2	Enamel	Siwaliks (India)	Patnaik et al. (2019)	Stegodontidae
3.1	-0.1	-5.4	Enamel	Siwaliks (India)	Patnaik et al. (2019)	Elephantidae
5.3	-3	-10.1	Enamel	Siwaliks (India)	Patnaik et al. (2019)	Bovidae
2	0.1		Enamel	Siwaliks (Pakistan)	Khan et al. (2020)	Equidae
2	-2.4		Enamel	Siwaliks (Pakistan)	Khan et al. (2020)	Equidae
2	-0.3		Enamel	Siwaliks (Pakistan)	Khan et al. (2020)	Equidae
2	-0.06		Enamel	Siwaliks (Pakistan)	Khan et al. (2020)	Equidae
3.5	-1.4		Enamel	Siwaliks (Pakistan)	Khan et al. (2020)	Bovidae
3.5	-7.7		Enamel	Siwaliks (Pakistan)	Khan et al. (2020)	Bovidae
7.7	-5.1		Enamel	Siwaliks (Pakistan)	Waseem et al. (2020a)	Equidae
7.7	-3.3		Enamel	Siwaliks (Pakistan)	Waseem et al. (2020a)	Equidae
8.3	-7.9		Enamel	Siwaliks (Pakistan)	Waseem et al. (2020a)	Equidae
8.8	-11.2		Enamel	Siwaliks (Pakistan)	Waseem et al. (2020a)	Equidae
